# Supplementary material
Source: publisher figshare collection journal article supplement (https://tandf.figshare.com/articles/dataset/_/24117920)
Supplement: Supplementary file 8 [file 1]

Atmosphere-Ocean

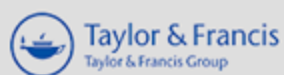

## High-resolution lead-lag relations between Barents Sea temperatures, the AMOC and the AMO during 1971-2018

|                               |                                                                                                                          |
|-------------------------------|--------------------------------------------------------------------------------------------------------------------------|
| Journal:                      | <i>Atmosphere-Ocean</i>                                                                                                  |
| Manuscript ID                 | AO-2022-0040.R4                                                                                                          |
| Manuscript Type:              | Applied Research / Recherche appliquée                                                                                   |
| Date Submitted by the Author: | 07-Jul-2023                                                                                                              |
| Complete List of Authors:     | Lehre Seip, Knut; Oslo Metropolitan University, Technology, art and design<br>wang, Hui; NOAA, Climate Prediction Center |
| Keywords:                     | Barents Sea, North Atlantic, Ocean variability time series, AMOC, AMO, Lead-lag relations                                |
|                               |                                                                                                                          |

SCHOLARONE™  
Manuscripts

Figure 1

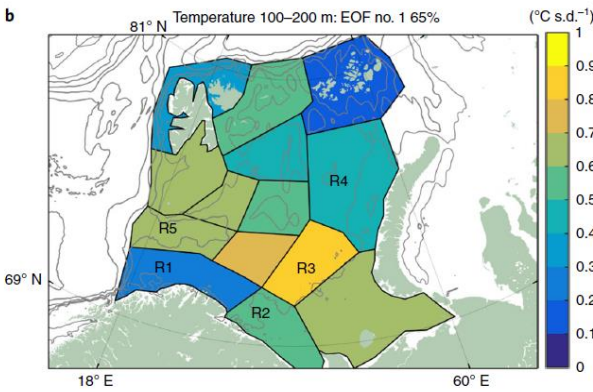

Figure 2

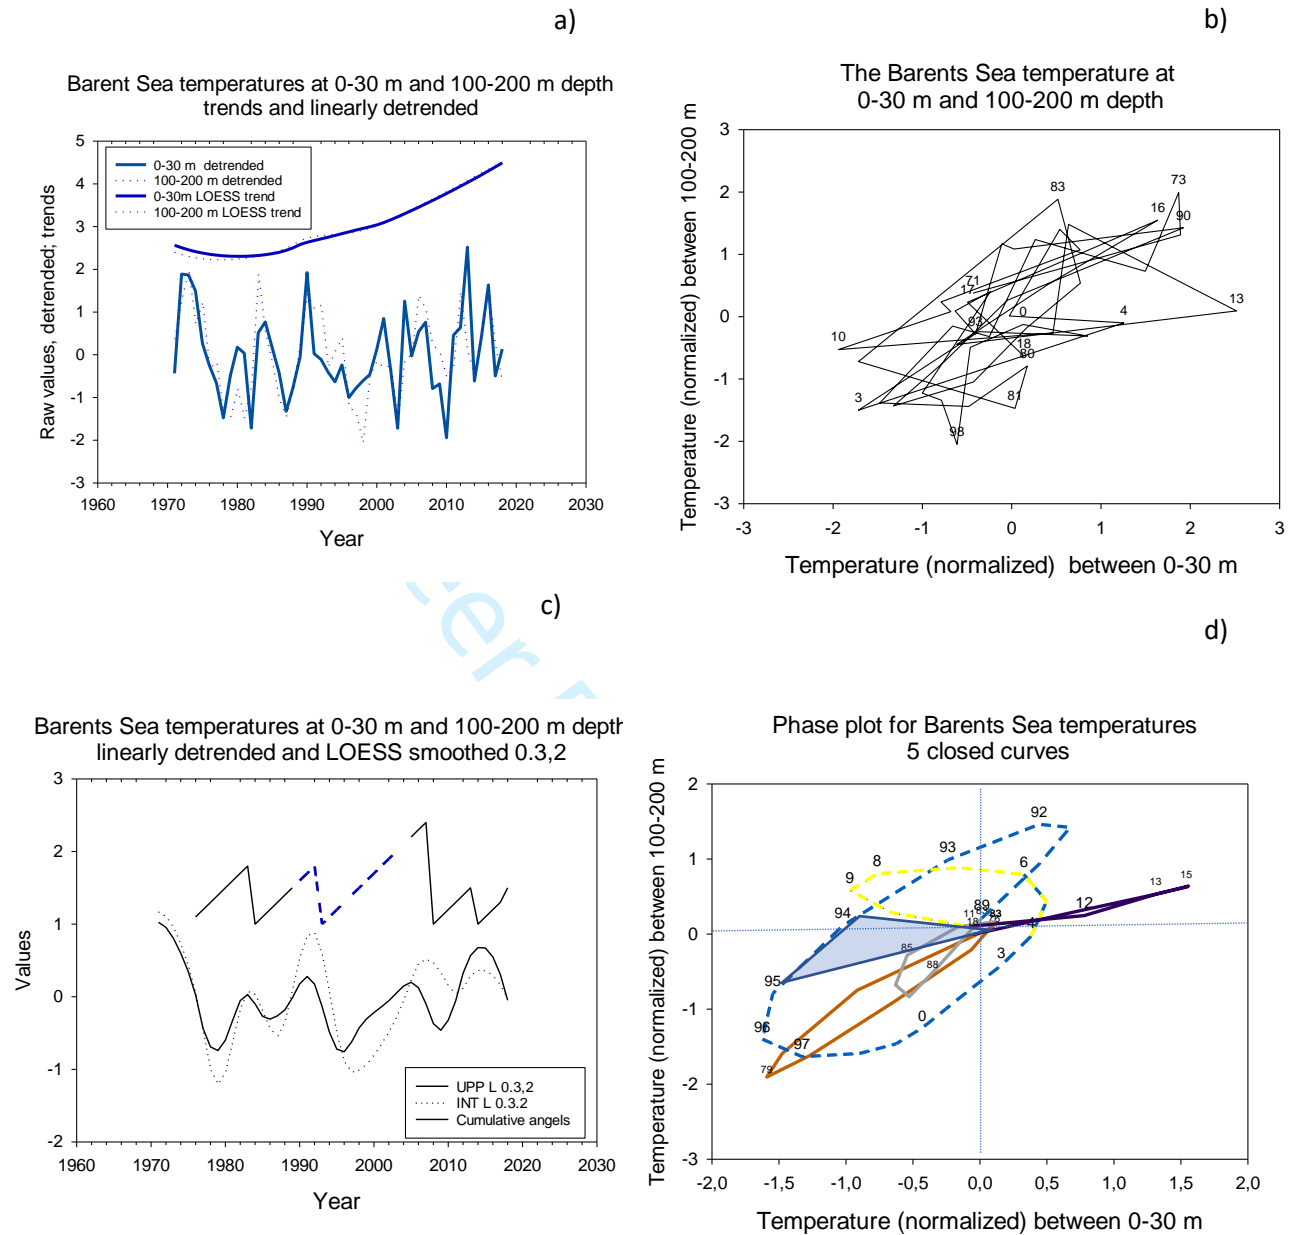

Figure 3 Results 1

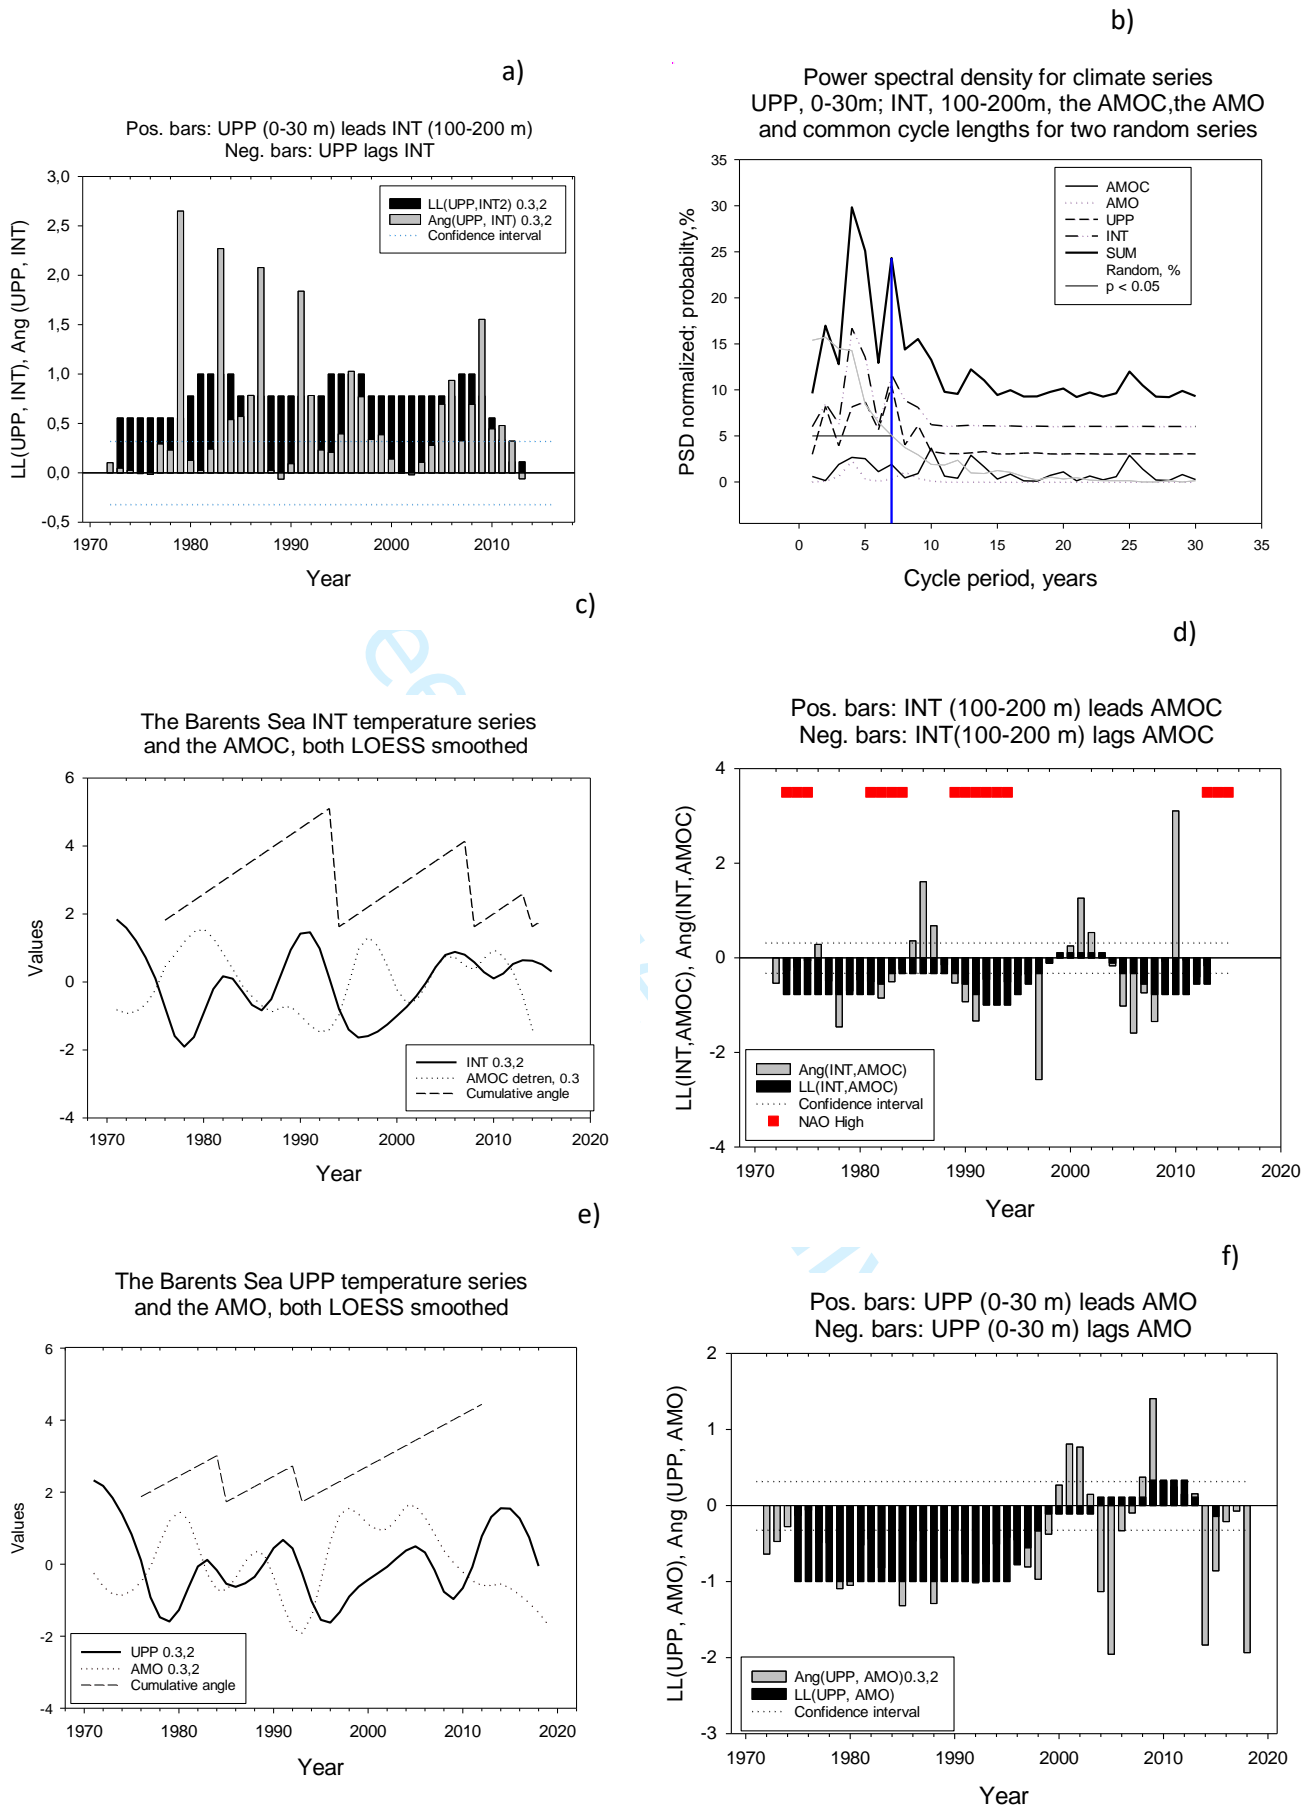

Figure 4

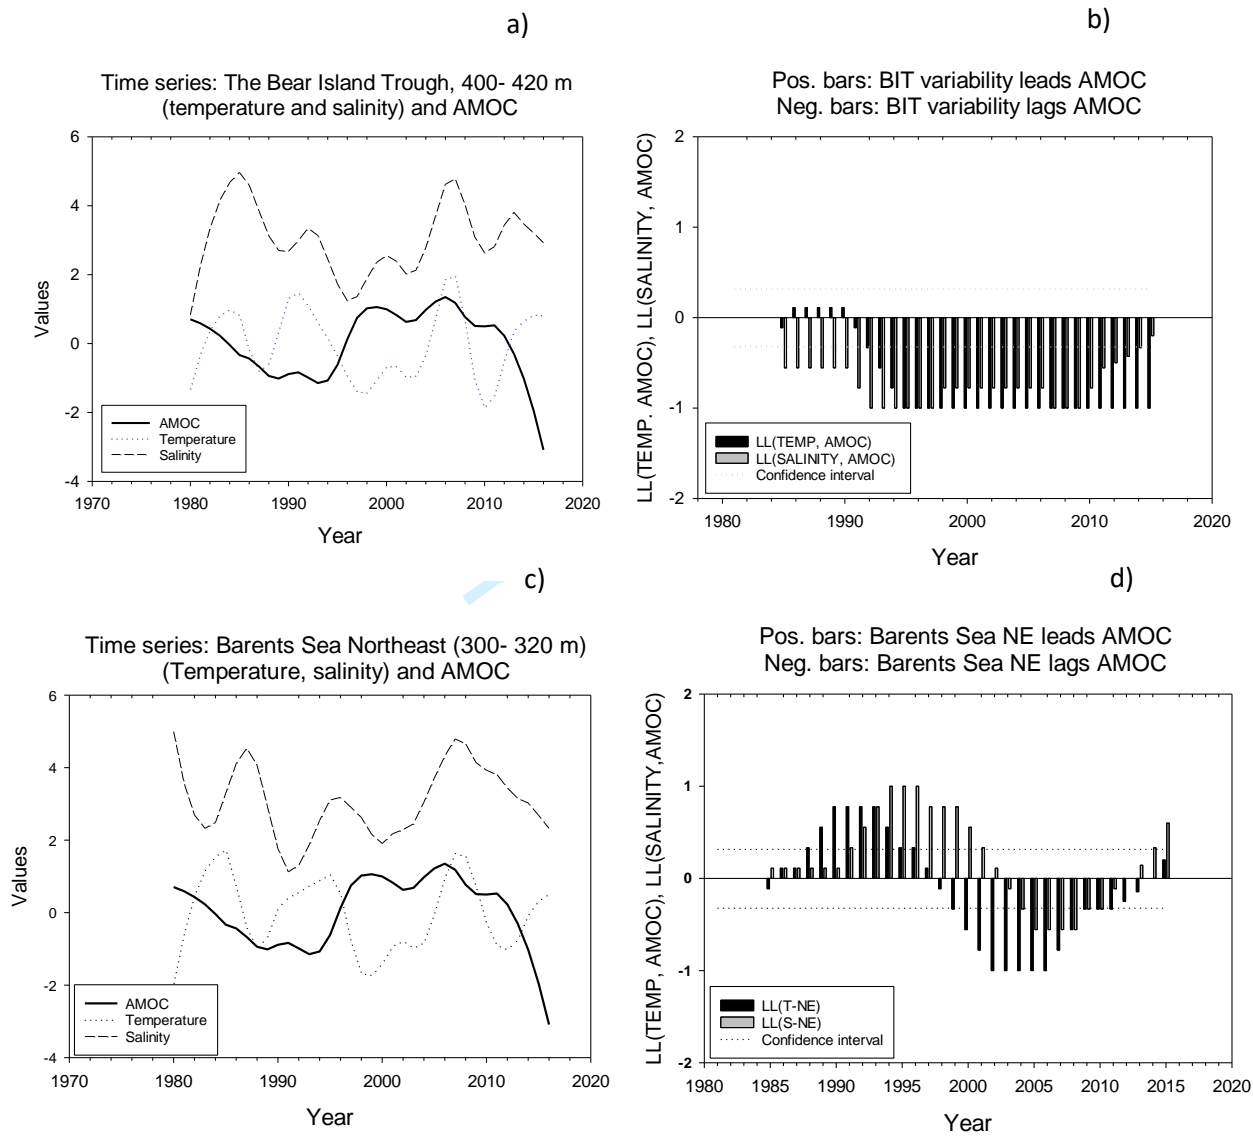

Supplementary material A

Figure SA

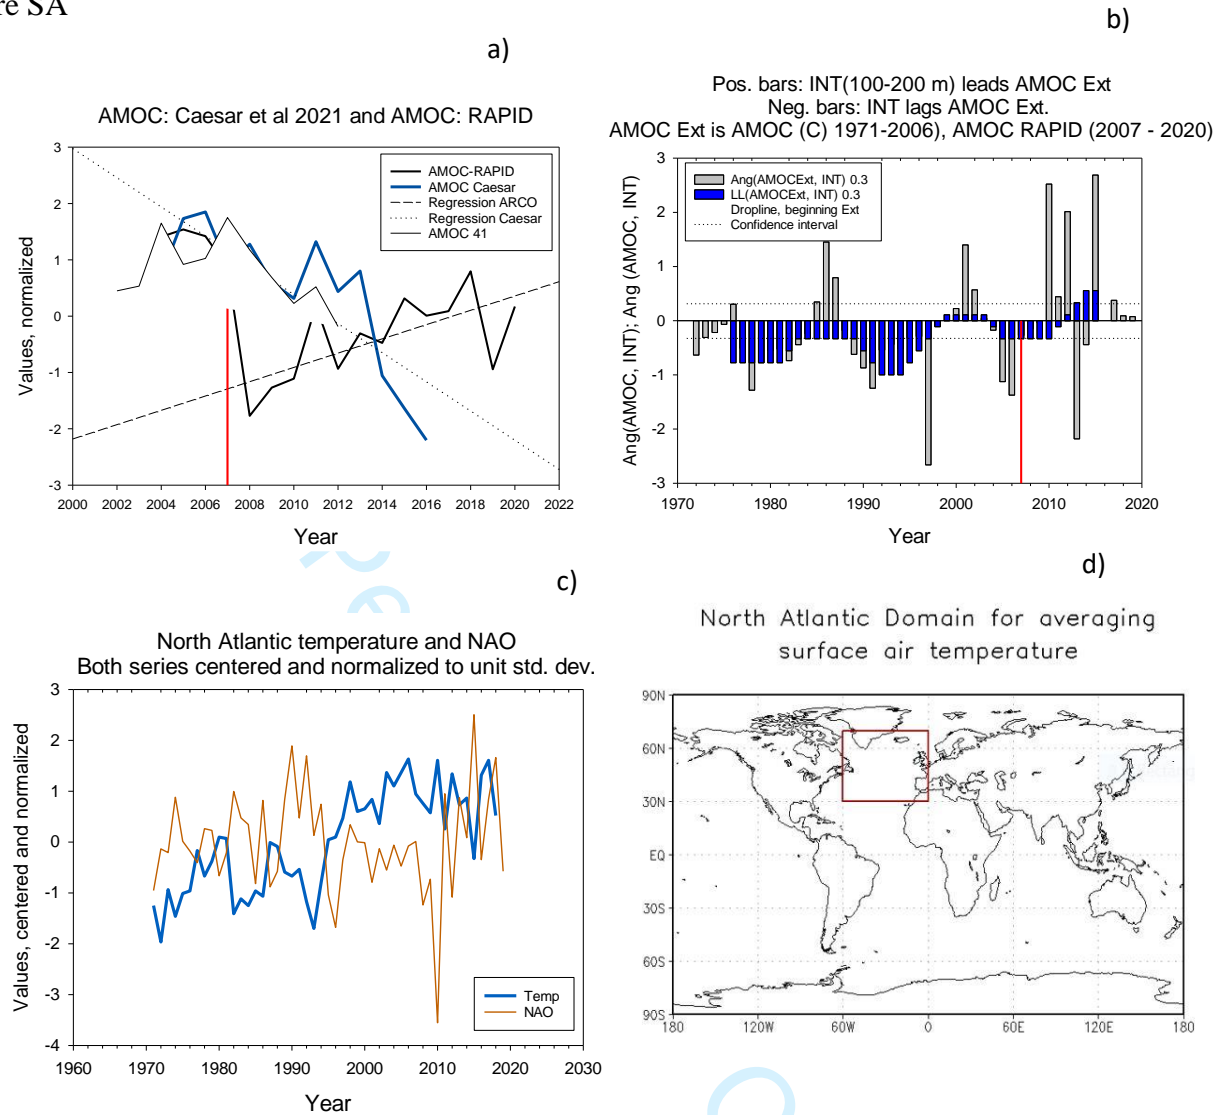

## Supplementary material Figure SB

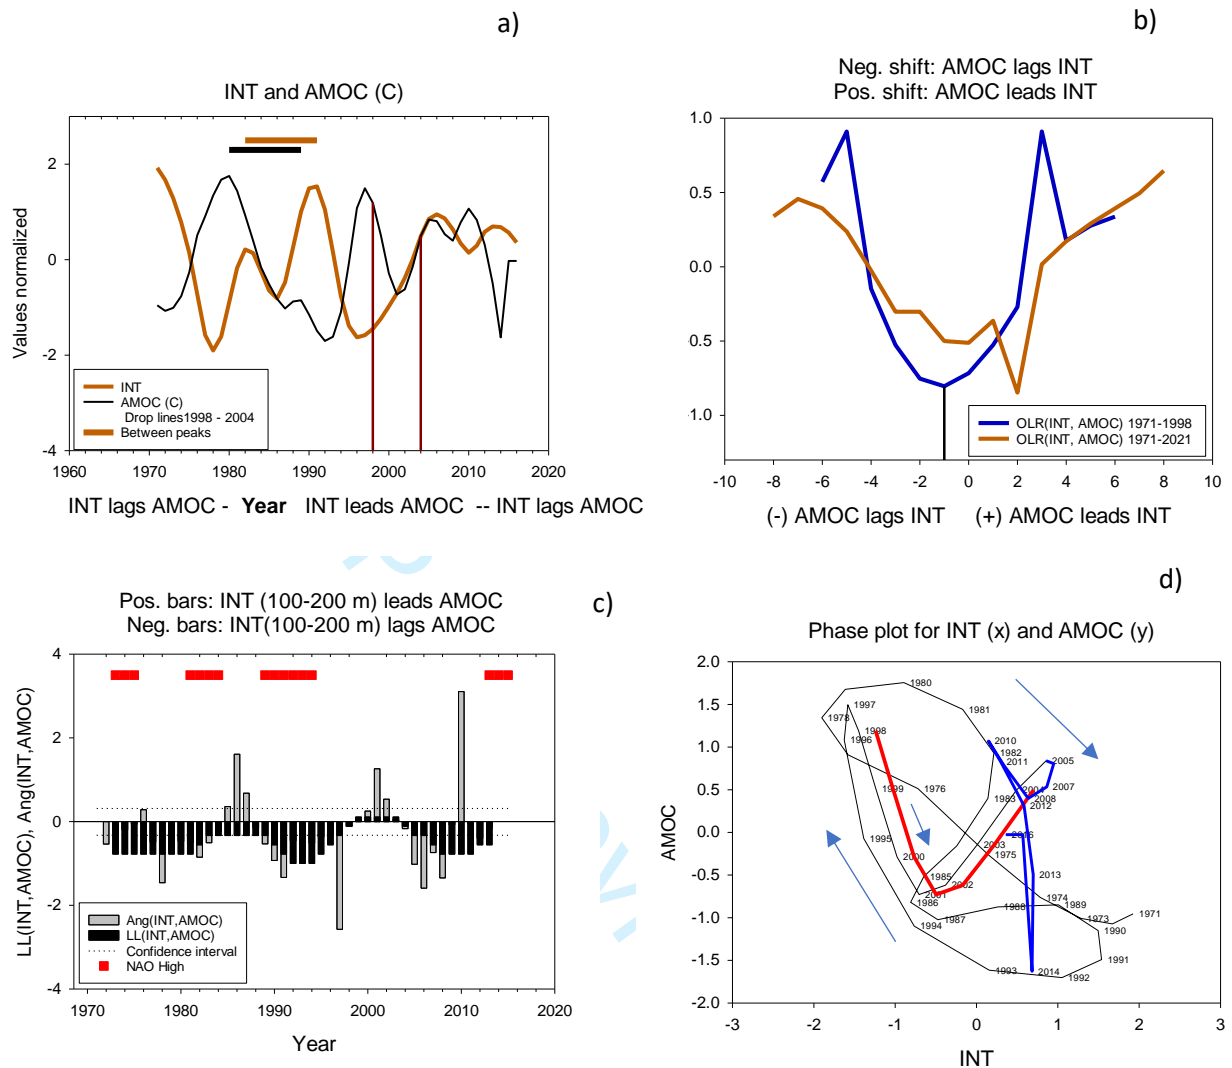

Supplementary Material Figure C

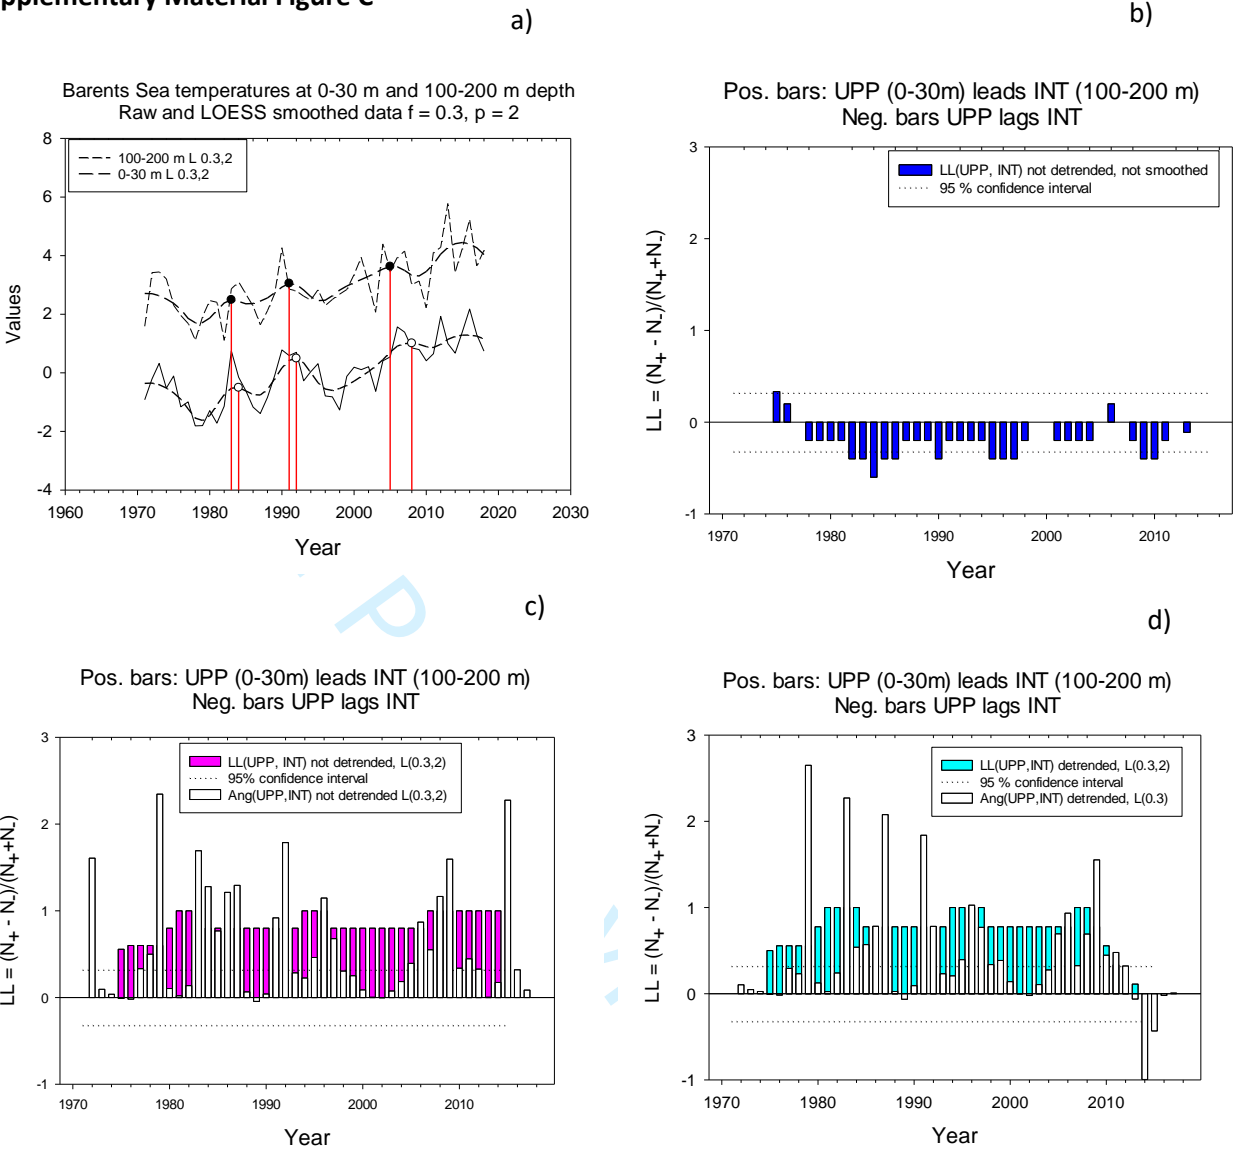



Figure SD, Supplementary material D

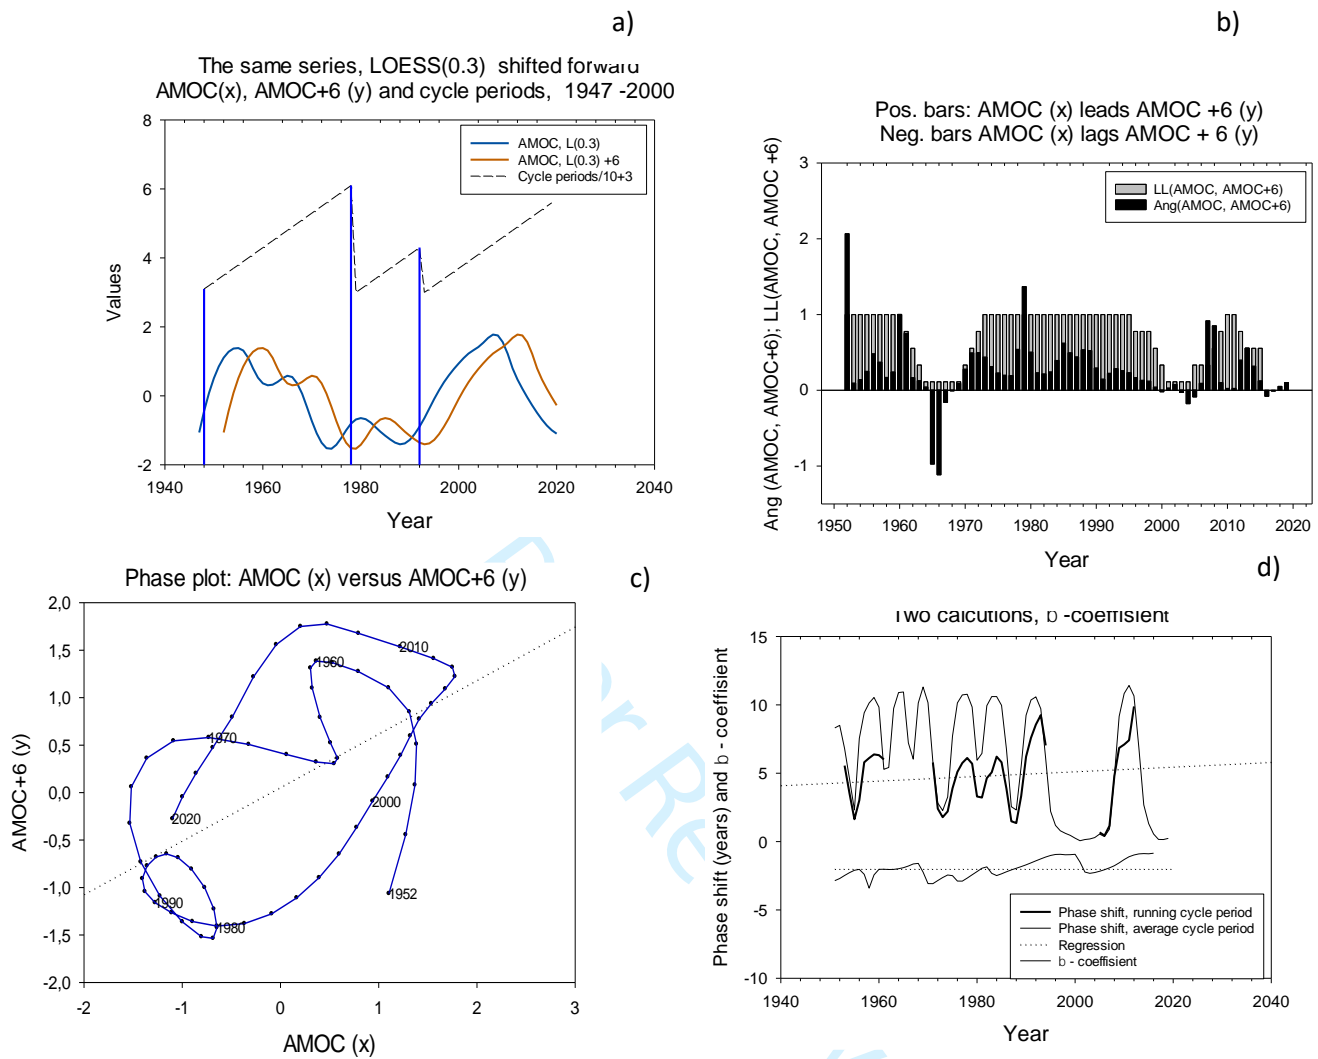

1  
2  
3  
4  
5  
6  
7  
8  
9  
10  
11  
12  
13  
14  
15  
16  
17  
18  
19  
20  
21  
22  
23  
24  
25  
26  
27  
28  
29  
30  
31  
32  
33  
34  
35  
36  
37  
38  
39  
40  
41  
42  
43  
44  
45  
46  
47  
48  
49  
50  
51  
52  
53  
54  
55  
56  
57  
58  
59  
60

1

Atmosphere-ocean

**High-resolution lead-lag relations between Barents Sea temperatures, the AMOC and the AMO during 1971-2018**

Knut L. Seip<sup>a</sup> Hui Wang<sup>b</sup>.

<sup>a</sup> *Oslo Metropolitan University, Oslo, Norway, Pilestredet 35, P.O. Box 4, 0130 Oslo Norway*

<sup>b</sup> *NOAA/NWS/NCEP/Climate Prediction Center, 5830 University Research Court, NCWCP, College Park, MD 20740, USA*

Knut L. Seip, Professor, dr. philos. Oslo Metropolitan University

Hui Wang, Meteorologist, NOAA/NWS/NCEP/Climate Prediction Center.

*Corresponding author:* Knut L. Seip, [knut.lehre.seip@oslomet.no](mailto:knut.lehre.seip@oslomet.no)

Hui Wang: [hui.wang@noaa.gov](mailto:hui.wang@noaa.gov)

122-23-05-23

## 14 Abstract

15 The direction of heat transport from the atmosphere to the Barents Sea, and between the  
16 Barents Sea and the North Atlantic is important for understanding the interplay between  
17 Greenland ice melting and anthropogenic forcing. Here, we show how heat has been  
18 transported between water bodies by using a high-resolution lead-lag technique that identifies  
19 leading relations between cyclic temperature series. The results demonstrate that near-  
20 surface ocean temperature (0-30 m) in the Barents Sea led the temperature changes in its  
21 intermediate waters (100-200 m) during the period 1971 to 2018 inferring that heat transport  
22 is from the atmosphere to the intermediate waters. The Barents Sea's temperatures lagged the  
23 Atlantic meridional overturning circulation (AMOC) and the Atlantic multidecadal  
24 oscillation (AMO) from 1971 to 2000. The AMOC was leading the Barents Sea near-bottom  
25 temperatures in the West (the Bear Island Through) during 1980-2018 but was both leading  
26 and lagging in the Barents Sea Northeast.

28 Key words: Barents Sea, North Atlantic, Barents Sea current variability, AMOC, AMO,  
29 NAO, lead-lag relations

30

31

**Relations à haute résolution entre les températures de la mer de Barents, l'AMOC et l'AMO pendant la période 1971-2018**

**Résumé**

La direction du transport de chaleur de l'atmosphère vers la mer de Barents, et entre la mer de Barents et l'Atlantique Nord, est importante pour comprendre l'interaction entre la fonte des glaces du Groenland et le forçage anthropique. Nous montrons ici comment la chaleur a été transportée entre les masses d'eau en utilisant une technique de traînée à haute résolution qui détermine les relations principales entre les séries de températures cycliques. Les résultats montrent que la température de l'océan proche de la surface (0-30 m) dans la mer de Barents précède les changements de température dans ses eaux intermédiaires (100-200 m) au cours de la période 1971-2018, ce qui permet de déduire que le transport de chaleur s'effectue de l'atmosphère vers les eaux intermédiaires. Les températures de la mer de Barents sont en retard par rapport à la circulation méridienne de retournement de l'Atlantique (AMOC) et à l'oscillation multidécennale de l'Atlantique (AMO) de 1971 à 2000. L'AMOC était en avance sur les températures près du fond de la mer de Barents à l'ouest (île Bear) pendant la période 1980-2018, mais était à la fois en avance et en retard dans le nord-est de la mer de Barents.

Mots clés : Mer de Barents, Atlantique Nord, variabilité des courants de la mer de Barents, AMOC, AMO, NAO, relations de traînée

## 1. Introduction

The objective of the present study is to examine lead-lag (LL) relations and heat transfer between the cyclic variables observed in the Barents Sea by Skagseth et al. (2020) and between Barents Sea temperature observations, the Atlantic meridional overturning circulation (AMOC) and the Atlantic multidecadal oscillation (AMO) in the North Atlantic. By identifying the LL relations between cyclic temperature series, we infer the direction of heat transport between water bodies on a decadal scale. The throughflow between the Barents Sea and the North Atlantic is projected to increase with increasing CO<sub>2</sub> in the atmosphere, and with an accompanying warming of the ocean (Drinkwater et al., 2021).

### 1.1 A high-resolution lead-lag method

Lead-lag relations can support interpretations of causal effects, as the cause must come before the effect. In the present context, they can help identify when an ocean mode impacts another ocean mode and for how long. The high-resolution lead-lag (HRLL) method we use here allows us also to see, for short time windows, when LL relations are strong and when LL directions change. The shortest time window is three synoptic time steps in the paired series, and a 95% confidence interval can be identified with nine synoptic time steps. LL relations as a prerequisite for causal effects are explored in several papers (Sugihara et al., 2012; Sugihara & May, 1990; Tsonis et al., 2015). The HRLL method differs from alternative methods, e.g., cross correlation analysis (CCA), in that series do not have to be stationary. If they have a similar trend, they do not have to be detrended. The HRLL method also allows us to identify common cycle periods and phase shifts for a pair of time series (Seip et al., 2018; Seip & McNown, 2007). An important aspect of LL relations that is observed *in situ* is that they should be identified also in modeling studies.

1  
2  
3  
4  
5  
6  
7  
8  
9  
10  
11  
12  
13  
14  
15  
16  
17  
18  
19  
20  
21  
22  
23  
24  
25  
26  
27  
28  
29  
30  
31  
32  
33  
34  
35  
36  
37  
38  
39  
40  
41  
42  
43  
44  
45  
46  
47  
48  
49  
50  
51  
52  
53  
54  
55  
56  
57  
58  
59  
60

76 1.2 The Barents Sea

77 The paper does not attempt to present physical or mechanical explanations but serves as a  
78 backdrop for previous studies that discuss, and have contrasting views on, the importance of  
79 heat transports between the Barents Sea, the Labrador Sea, and the North Atlantic. The  
80 Barents Sea has been described by Skagseth et al. (2020) as a cooling machine for global  
81 warming, in the sense that the Barents Sea’s warming (declining sea-ice content) will slow  
82 down its role of cooling the lower limb of the AMOC. Dickson et al. (2000) found that a high  
83 North Atlantic oscillation (NAO) index suggests an increase in the Atlantic water inflow to  
84 the Arctic Ocean via the Barents Sea Throughflow. Oldenburg et al. (2021) found that the  
85 upper ocean density in the Labrador Sea drives changes in the AMOC, whereas Li et al.  
86 (2021) showed that deep western boundary changes in the subpolar North Atlantic had  
87 minimal impact on overturning characteristics. Moore et al. (2022) showed that sea-ice retreat  
88 may cause a re-organization of water mass transformation in the Barents Sea. Contrasting  
89 views on causes and effects between ocean variabilities also exist for the North Atlantic  
90 ocean climate series, e.g., Clement et al. (2015) and Zhang et al. (2019) on AMOC and  
91 AMO. Thus, we believe that there is a need for a data-driven description of relations between  
92 ocean time series that goes beyond ordinary linear regressions (OLR) and CCA analysis.

93 We make three sets of analyses, the first on the LL relations between the temperature series  
94 for the upper ocean depth layer 0-30 m (UPP) and the intermediate depth layer 100-200 m  
95 (INT) in the Barents Sea. The second analysis is on the interactions between the UPP, the  
96 INT and the North Atlantic AMOC and the AMO series. The third analysis is on the  
97 interactions of near bottom flows between two Barents Sea outlets and the North Atlantic  
98 climate series, the AMOC and the AMO. For the latter two cases, we add assumptions about

the validity of choosing the AMOC and the AMO as time series that interact with the Barents Sea modes.

## 2. Materials

The study area is the Barents Sea ( $18^{\circ}\text{E} - 60^{\circ}\text{E}$ ,  $68^{\circ}\text{N} - 80^{\circ}\text{N}$ ), as shown in Figure 1.

The hydrographic data used in the present study are from the joint Institute of Marine

Research (IMR), Norway and the Nicolai M. Knipovich Polar Research Institute of Marine

Fisheries and Oceanography (PINRO), Russia. We use four sets of data: i) the observed

annual temperature data for the Atlantic inflow to the Barents Sea (BS) at depths 0-30 m,

UPP, and 100-200 m, INT, from 1971 to 2018; ii) the observed annual data for temperature

and salinity outflow series at the Bear Island trough (BIT) at near-bottom depths 400-420 m

from 1980 to 2018; iii) the annual temperature and salinity outflow series at the Northeast

Barents Sea (BS-NE) at near-bottom depth 300- 320 m from 1980 to 2018; and iv) the

observed annual data for the AMOC and the AMO from 1971 to 2018. Data i) to iii) were

supplied by Skagseth et al. (2020) and are used to characterize temperature change and

salinity flows in the Barents Sea.

Data for the AMOC was supplied by Levke Caesar, Potsdam Institute for Climate Impact

Research (Caesar et al., 2021; Caesar et al., 2018). These authors reconstructed the evolution

of the AMOC index based on several different and largely independent proxy indicators of

the AMOC (e.g., sea surface temperatures, subsurface water mass properties and evidence for

physical changes in deep - sea currents). The corroborating series cover the North Atlantic

from about  $40^{\circ}\text{N}$  to  $60^{\circ}\text{N}$  (Caesar et al., 2021). Observed time series for the AMOC index are

available from 2004 to 2019 (Frajka-Williams et al., 2019) and a recent version of this series

was retrieved from Moat et al. (2022). A through description of the relations between the two

AMOC series is given in Wang et al. (2019, p. 1-3). The different AMOC indices show

1  
2  
3  
4  
5  
6  
7  
8  
9  
10  
11  
12  
13  
14  
15  
16  
17  
18  
19  
20  
21  
22  
23  
24  
25  
26  
27  
28  
29  
30  
31  
32  
33  
34  
35  
36  
37  
38  
39  
40  
41  
42  
43  
44  
45  
46  
47  
48  
49  
50  
51  
52  
53  
54  
55  
56  
57  
58  
59  
60

positive and negative slopes after 2007, but they also measure different characteristics of ocean overturning circulations (Supplementary Material A). Recently, based on the trans-basin mooring array OSNAP, 2014-2018, alternative AMOC indices have been developed for the 2014-2018 period based on the thickness (m) of ocean layers delimited by density measures ( $\text{kg m}^{-3}$ ). With a density-based index, Li et al. (2021) showed that events in the Labrador Sea have little impact on AMOC overturning characteristics. We choose the Caesar et al. (2021) / Moat et al. (2022) version because it covers our period 1971 to 2018.

The time series for the unsmoothed AMO was obtained from Enfield et al. (2001), available at <https://www.psl.noaa.gov/data/timeseries/AMO/>. The NAO data were retrieved from <https://www.ncdc.noaa.gov/teleconnections/nao/>.

The AMOC series describe the volume of water transport ( $\text{Sv}$ ) down to about 3500 m, the AMO describes sea surface temperatures down to approximately 5 m, and the NAO describes atmospheric surface pressure differences between a northern station, Reykjavik, and a southern station, Lisbon. The NAO index is used as a proxy for cold (-) and warm (+) phases in the North Atlantic (Dickson et al., 2000), but temperature data from Kalnay et al. (1996) on North Atlantic temperatures provides a somewhat different picture, in particular before 1995 (Supplementary Material A).

The observed series for the AMOC, the AMO and the NAO may be superpositions of several series that represent different mechanisms (Zhang et al., 2019). The LL relations between the series may therefore also depend on which of the components are examined. Attributing different mechanisms to different components in the AMO is for example shown in Fang et al. (2021).

The North Atlantic Ocean interdecadal variability shows cycle periods of about 20 years (Arzel & Huck, 2020) but also cycles with shorter and longer periods. The AMOC and the



147 AMO both show cycle periods of 20 years (Seip et al., 2019). During the period 1971 to 2018  
 148 there was a slowdown in global warming from 1998 to 2012 (Cheng et al., 2015). Properties  
 149 of the AMOC slowdown during the last bi-decade have been discussed by e.g., Boers (2021)  
 150 and the impact of Arctic Sea-ice retreat by Moore et al. (2022).

151 Linearly detrended temperature anomaly time series normalized to unit standard deviation in  
 152 the Barents Sea for both the UPP and INT layers are shown as the two lower curves in Figure  
 153 2a. The actual ranges of temperatures were about 3°C for the 0 – 30 m layer and 1 – 2°C for  
 154 the 100 – 200 m layer (Skagseth et al., 2020).

### 155 3. Methods

156 The high-resolution LL method used here (Seip, 1997; Seip et al., 2018; Seip & McNown,  
 157 2007), and the LL method described by Krüger (2021) are to our knowledge the only LL  
 158 methods that calculate LL relations over very short time windows ( $n = 3$ ,  $n = 9$  allows  
 159 identification of confidence interval). They are based on a dual representation of two time  
 160 series. One is the presentation of the series along a time axis. The other is a representation in  
 161 a phase diagram with one series on the x-axis and the other series on the y-axis. If the phase  
 162 diagram trajectories rotate in a persistent direction, then the two series also show persistent  
 163 LL relations depending upon the direction of rotation. For series normalized to unit standard  
 164 deviation, the phase diagram will show an elliptic form with the major axis in the 1:1 or the  
 165 1:-1 direction (Figure 2b and d). A quick illustration of the relation between the two  
 166 representations is given by the Lissajous curve and an example of a similar method based on  
 167 synthetic series is shown in Krüger (2021).

168 The angle  $\theta(3)$  between two sequential trajectories  $\bar{v}_1$  and  $\bar{v}_2$ , defined by three sequential  
 169 points in the phase plot, is calculated by Equation (1).

$$\theta(3) = \text{sign}(\bar{v}_1 \times \bar{v}_2) \cdot \text{Acos} \left( \frac{\bar{v}_1 \cdot \bar{v}_2}{|\bar{v}_1| \cdot |\bar{v}_2|} \right) \quad (1)$$

The equation is similar to that used to describe the Coriolis force. From these angles, we identify an LL strength measure. It is formulated as a function of the number of positive angles,  $N_{\text{pos}}$ , minus the number of negative angles,  $N_{\text{neg}}$ , divided by the total numbers of positive and negative angles:

$$\text{LL} = (N_{\text{pos}} - N_{\text{neg}}) / (N_{\text{pos}} + N_{\text{neg}}) \quad (2)$$

The number  $N_{\text{tot}} = N_{\text{pos}} + N_{\text{neg}} = 9$  is a trade-off between the ability to detect changes in LL relations over short time windows, and the opportunity to identify reasonably narrow confidence intervals. Since the method is relatively novel, we compare and discuss the HRLL method to traditional cross correlation analysis (CCA), e.g., as in Fang et al. (2021) and in Supplementary Material B.

*Detrending and smoothing.* We detrend the Barents Sea data with the linearly detrending algorithm that is among the most parsimonious detrending algorithms. However, there are concerns that detrending data would shift the time in the LL relation between paired time series relative to the LL relations they have in raw, non-detrended version. We, therefore, compare their LL relations in the raw and detrended version. To our knowledge, the HRLL method is the only method that would allow comparison of time series that are not detrended.

We LOESS smooth the two time series. The LOESS algorithm has two parameters: the fraction of the series that is used as a moving window ( $f$ ) and the polynomial degree for interpolating ( $p$ ). Since we always use  $p = 2$ , we use the terminology LOESS( $f$ ) in the text, but in the legends, we use the numbers  $f, 2$  after the acronym for the variables. LOESS smoothing and filtering time series may disentangle time series that are superpositions of different frequencies describing different physical processes and different LL relations. Here,

we LOESS(0.3) smooth the series to reduce high frequencies that may represent noise in the series. We examine the effects of smoothing in Section 5. Discussion.

*Significance.* The 95% significance interval is found by applying Eq. (1) and Eq. (2) to two uniform random series. The results show that  $LL < -0.32$  and  $LL > 0.32$  are significant for time series longer than 9 time steps (Seip & Grøn, 2017). However, the confidence interval depends upon the characteristics of the time series, and LOESS smoothing would increase the confidence interval. We, therefore, also consider the angle values  $\theta(3)$ . If the  $\theta(3)$  shows persistent negative or positive values, significant LL relations are supported. Note that the  $\theta(3)$  does not relate to the confidence interval.

*Cycle periods.* Cycle periods are calculated in three ways. First, we calculate the distance between zero crossings for the two time series normalized to unit standard deviation. Second, we apply power spectral density (PSD) algorithm to the two time series. Cycle periods less than about 7-time steps have a probability to occur by chance that is greater than 1:20 for two stochastic series that interact. Third, we add cumulatively the angles,  $\theta(3)$ , in the phase plot for paired series. When the cumulative angle reaches  $2\pi$ , one cycle is closed in the phase diagram, and this corresponds to one common cycle length for the two cyclic time series. For example, the angle,  $\theta$ , is the angle with the center in the origin and lines going out to the points numbered 94 and 95 in Figure 2d.

*Phase shifts, or lead-lag times.* If two sine series with a common cycle period,  $\lambda$ , coincide perfectly, the ordinary linear regression (OLR) for the cycles would show a regression coefficient = 1.0 and  $r = 1.0$ . If one series is displaced  $\frac{1}{4}\lambda$  relative to the other, the two sine functions would show a perfect circle with  $\beta = 0$  and  $r = 0$ . An approximation for the phase shift (PS) or the lead or lag time can be calculated as

$$PS = \lambda / 2\pi \times (\pi/2 - \text{Arcsine}(r)) \quad (3)$$

1  
2  
3  
4  
5  
6  
7  
8  
9  
10  
11  
12  
13  
14  
15  
16  
17  
18  
19  
20  
21  
22  
23  
24  
25  
26  
27  
28  
29  
30  
31  
32  
33  
34  
35  
36  
37  
38  
39  
40  
41  
42  
43  
44  
45  
46  
47  
48  
49  
50  
51  
52  
53  
54  
55  
56  
57  
58  
59  
60

To calculate the PS, we must know the cycle period,  $\lambda$ , in advance.

4. Results

We first present the LL relations and the results on cycles for the Barents Sea observations UPP and INT during 1971-2018. Then we examine the LL relations between the UPP, INT, AMOC, and AMO. Last, we show the results for the temperature and salinity series for the BIT and BS-NE regions and their LL relations to the AMOC and the AMO. We only discuss the detrended series.

Both the UPP and INT waters show an increasing trend in temperature over the 1971-2018 period (Figure 2a). The series are linearly detrended and LOESS(0.3) smoothed and are shown as the lower pairs of series in Figure 2c. Using the cumulative angle method to identify common cycle periods we obtain the cycle periods characterized by the zigzag curve in the upper part of Figure 2c. We identify closed curves in the phase plot, Figure 2d, and they show that the cycle periods for the smoothed series correspond to closed curves in the phase plot.

4.1 The Barents Sea upper and intermediate depth layers

By using the HRLL method to calculate LL relations between the two temperature time series, we find that the UPP series were significantly leading the INT series until two years before the last year 2015, Figure 3a. Since we calculate the angles,  $\theta(3)$ , over three consecutive observations in the phase diagram and normalize the series to unit standard deviation, they will show an elliptic form in the 1:1 or 1:-1 direction and the angles,  $\theta(3)$ , will typically form a wave like pattern (light grey bars) as the moving window traces the ellipsoid (Figure 3a). Since the LL method examines rolling time windows for nine consecutive years, the LL relations for the first and the last four years cannot be calculated.

## 4.2 Cycle periods

We used three methods to distinguish cycle periods, the zero crossing technique, the PSD method and the HRLL method.

The *zero crossings technique* showed cycle periods of 6, 6, 2, 4, 4, 11, 4, 5, 6 years for the UPP series (average  $5.3 \pm 2.5$  years) and cycle periods of 6, 6, 2, 4, 6, 10, 10, 13 years for the INT series (average  $6.7 \pm 3.4$  years), both series of cycle periods starting in 1971.

We apply the *PSD algorithm* to the LOESS(0.3) smoothed UPP and INT series, to the detrended AMOC series and to the AMO series, Figure 3b. There are common cycle periods of 7 years for the three series: UPP, INT, and AMOC. The AMO shows peaks at 4 and 8 years. However, extending the PSD graphs to longer cycle periods **reveals** common cycle periods of about 20 years for AMOC, AMO, and NAO (Seip et al. 2019). For the AMO series there are peaks at 4 and 8 yrs. The light blue line shows the percentage of common cycle periods that could be generated by two random series using the cumulative angle method described in the Method section. Cycle periods greater than 7 years have a probability of less than 5% to occur.

The HRLL method calculates common cycle periods for paired series with the cumulative angle method. The cumulative angle method identifies the common cycles for the two Barents Sea temperature series UPP and INT. There are four completed cycles of 8, 8, 14, and 5, giving an average of  $7.6 \pm 4.2$  years.

## 4.3 The Barents Sea upper and intermediate waters, the AMOC and the AMO

Figure 3c shows a comparison between INT and the AMOC, both LOESS(0.3) smoothed. The cycle periods found by the cumulative angle method are displayed as the see-saw line above the two time series. The AMOC is generally a leading variable to the INT (100 to 200 m) waters in the Barents Sea (Figure 3d). Figures 3e and f show similar results for the UPP

series (0 - 30 m) in the Barents Sea and the AMO. For both LL relations, the leading role of the AMOC/AMO is persistent until 1998.

#### 4.4 The West Bear Island Trough and the Barents Sea-Northeast region

We calculate the LL relations between time series for temperature and salinity at two sub-regions, the BIT and the BS-NE and the AMOC during the period 1980 to 2018. The results are shown in Figure 4. The AMOC is a leading variable to both temperature and salinity in the BIT region, but in the BS-NE region, the temporal relationship is more complex.

The temperature series,  $T$  ( $^{\circ}\text{C}$ ), and the salinity series,  $S$  (ppm), are closely associated with each other in the BIT region, but not at the BS-NE region. At the BIT region we get  $T = 2.0 \pm 0.7$  and  $S = 35.01 \pm 0.04$ . A regression between  $T$  and  $S$  results in  $r = 0.56$ ,  $p < 0.001$ ,  $n = 39$ .

At the BS-NE region,  $T = -0.60 \pm 0.47$  and  $S = 34.92 \pm 0.03$ . A regression between  $T$  and  $S$  results in  $r = 0.09$ ,  $p > 0.59$ ,  $n = 39$ . We find that the AMOC was a leading variable to both the temperature and salinity series at the BIT region (Figure 4a, b). However, at the BS-NE region, the AMOC was a significant lagging variable to temperature from 1991 to 1996, but a leading variable from 2000 to 2010 (Figure 4c, d). The salinity series were leading series from 1991 to 2000, consistent with the AMOC as a density driven circulation. However, salinity became a lagging series from 2004 to 2010. In the BS-NE region it appears that there could be cycles in the LL relations of 10 to 15 years. The series at both locations, when paired to the AMOC, showed only one cycle greater than 7-time steps (significant at 95% level.)

#### 5. Discussion

We first discuss the concept of causality, cycles, and LL relations in the context of cyclic series. Then we examine the two temperature series in the Barents Sea, INT, and UPP. Third,

we discuss their relations to the AMOC and the AMO. Last, we discuss the temperature and salinity series at the near bottom at the outlet regions BIT and the BS-NE and their LL relations to the AMOC and the AMO.

#### 5.1 Causality, cycle periods and LL relations

To show that oceanic processes may impact each other, OLR is often applied to the two-candidate series representing the processes, and the resulting explained variance,  $R^2$ , is reported. Here, we add two new measures. We examine the LL relations between the time series, and we also examine if the two series have common cycle periods. Comparing LL relations between the two Barents Sea temperature series, the raw series and the detrended and smoothed series suggest that removing noise by lightly smoothing is required, but detrending does not change LL relations much, Supplementary Material C.

When we interpret LL relations, we assume that a persistent leading relation contributes to a causal effect for the target series. However, this is not a necessary conclusion. For example, with reference to biology, one plankton species may respond more slowly to temperature than another plankton species, and thus appear to be affected by the first (Seip & Reynolds, 1995).

It is a challenge to identify a recurrent cyclic pattern in ocean variability, if it exists (Mann et al., 2020). Many studies apply types of smoothing or removal of high frequency variability from ocean temperature series. For example, Hand et al. (2020) and used a 10-yr low-pass filter. There is no canonical way to determine an appropriate degree of smoothing since dynamic chaos may create unpredictable cyclic pattern (Li et al., 2020; Tomte et al., 1998). Stronger smoothing may identify sections of longer cycle periods, but the Barents Sea series are too short to establish cycle periods longer than those we identify here.



1  
2  
3  
4  
5  
6  
7  
8  
9  
10  
11  
12  
13  
14  
15  
16  
17  
18  
19  
20  
21  
22  
23  
24  
25  
26  
27  
28  
29  
30  
31  
32  
33  
34  
35  
36  
37  
38  
39  
40  
41  
42  
43  
44  
45  
46  
47  
48  
49  
50  
51  
52  
53  
54  
55  
56  
57  
58  
59  
60

309 5.2 Barents Sea upper and the intermediate waters

310 Although heat that is generated by enhanced CO<sub>2</sub> concentrations in the atmosphere is small,  
311 0.4 - 0.9 Wm<sup>-2</sup>, about 90 % of the heat flux into the oceans is stored in the oceans (Trenberth,  
312 2020). Therefore, net heat transport during global warming would be from the atmosphere to  
313 the oceans. However, there are pauses in the warming of the globe surface that may be caused  
314 by cold waters being brought to the surface layers of the oceans (Wu et al., 2019). One of  
315 these pauses, 1998 to 2012, is within the time window studied here. Second, there may also  
316 be localized atmospheric fluctuations in the heat transport (Alexander et al., 2002) that affect  
317 the heat transport between ocean layers in the Barents Sea. Third, heat may be transported  
318 from lower latitude oceans. Lastly, the winter mixed layer in the Barents Sea may be as deep  
319 as the intermediate layer ( $\approx 150$  m), and, therefore, potentially affect the net heat transport  
320 between the layers. However, heat transport from third sources or enhanced mixing depth is  
321 not sufficient to break up the LL relation between UPP and INT that is shown in the time  
322 series representation and in the numerical results.

323 5.2.1 Lead-lag relations

324 The LL relations show that the temperature in the upper layer is a leading variable to the  
325 temperature in the lower layer. An interpretation may be that it is the changes in the  
326 atmospheric temperature that affect the temperature in the Barents Sea during the period 1971  
327 to 2018. This is consistent with the conjecture by Skagseth et al. (2020) that there is little  
328 evidence that the upper-ocean warming is driven by increased upward mixing of heat from  
329 the warmer layer below in the northeast Barents Sea.

330 5.2.2 Cycle periods

331 The two Barents Sea time series show four equal cycle periods from the beginning of the  
332 series, 1971 to 1988. From around 2000, the two series start to diverge in cycle periods.



333 The year 2000 corresponds with Skagseth et al. (2020) findings that the year 2004  
334 distinguishes a “cold” period (1985-1999) from a “warm” period (2004-2018), the latter  
335 corresponding to a warming of the near-bottom temperature, a retreating sea-ice, and a one-  
336 quarter phase lag between surface and subsurface. The cycle periods are short, and the cycles,  
337  $\approx 7$  years, found by the cumulative angle method are just outside the 95% confidence interval  
338 for stochastically generated cycles, and therefore only weakly significant.

### 339 5.3 The Barents Sea outlets the AMOC and the AMO

340 There is abundant literature on possible relations between processes in the Barents Sea, the  
341 Labrador Sea, and the AMOC. However, recently there have been concerns regarding the  
342 importance of processes in the Barents Sea and the Labrador Sea for the AMOC; e.g., Li et  
343 al. (2021) on the Labrador Sea and Asbjornsen et al. (2020) on the Barents Sea. The Li et al.  
344 (2022) study covered only a short period, 2014 to 2018, but the period displayed pronounced  
345 changes in deep convection (the extended OSNAP time series were used by these authors),  
346 and, therefore, had the potential of showing effects from the Labrador Sea. However, the  
347 AMOC in density space has less variability compared to the AMOC in depth space in the  
348 subpolar region (Zhang, 2010, Figure 2), so that a strong influence from the Labrador Sea  
349 would be less likely observed. Here, we focus on the currents at Barents Sea outlets and  
350 their interaction with AMOC (in depth space) and the AMO currents in the North Atlantic.  
351 We presently are unable to provide mechanistic arguments for which of the two AMOC  
352 versions that would be most relevant for explaining the Barents Sea observations, but AMOC  
353 in density space is dependent on god characteristics of the deep density structure (Le Bras et  
354 al., 2023).

### 5.3.1 Lead-lag relations

Since the AMO is defined by sea surface temperatures, we compare the UPP temperatures in the Barents Sea (0 -30 m) with the AMO ( $\approx 0 - 5$  m). The results are similar to the AMOC results, but after 1998, the LL pattern became less persistent showing a short period 2009-2012 when AMO was lagging the UPP (Figure 3d and f).

We compare temperature and salinity time series for the BIT and the BS-NE regions to the AMOC (Figure 4a and b). The LL pattern at the two regions shows contrasting results. In the West (BIT), the AMOC significantly leads the near-bottom temperatures from 1992 to 2014. In the Northeast, BS-NE, the AMOC leads the near bottom temperatures until 1998 and then becomes lagging in the period 2004 to 2011. Asbjornsen et al. (2020) noted that there is a steep warming trend between 1996 and 2006 (See our Figure 4a) and suggested, based on a modelling study, that the warming of the open ocean domains in the northern Barents Sea during this period is due to horizontal and vertical thermal advection and diffusion. Skagseth et al. (2020) also identified a difference between the BIT and the BS-NE throughflow branches.

In the period from 1971 (the start of observations) and until about 2000, our results show that the AMOC is an overall leading variable to the variability of water temperatures in the BIT region. However, in the BS-NE region the near-bottom temperatures lead the AMOC (a period of 5 years if we only report statistically significant results), and then the AMOC becomes a leading variable for the near-bottom temperatures (a period of 6 years).

We have no firm explanations for the difference between the BIT and BS-NE regions, but there are some supporting explanations for the difference. The BS-NE waters are slightly less saline than the waters in the BIT region. Second, there may be an indirect effect of a Coriolis force that may distinguish stream flow characteristics between the two sides of fjords. It has,

for example, been shown to be present in a fiord going East West in the Spitsbergen (Pawłowska et al., 2017). Normally, a Coriolis force would enhance salinity on one side of a fiord. Lastly, there may be atmospheric phenomenon related to, for example, the positive or negative phases of the NAO (Dickson et al., 2000) or changes in the North Atlantic temperature (Kalnay et al., 1996) that may affect the throughflow.

### 5.3.2 Cycle periods

The observed series for the AMOC, the AMO and the NAO are possibly superimposed series of components that each represents specific mechanisms (Fang et al., 2021). The mechanisms may be generated by internal processes that have their source in ocean dynamics or large-scale pressure differences, i.e., the NAO, and they may be generated by external processes, like sea-ice retreats in the Nordic and Barents Seas. In addition, there will always be a high frequency stochastic noise component. Therefore, it may be reasonable that we find a complex relation between the Barents Sea water masses and the North Atlantic Ocean.

The PSD algorithm shows that the two temperature series from the Barents Sea, the AMOC and the AMO time series give cycle time of 7 to 9 years. To our knowledge, there is no definitive solution to the question of “true” cycles in climate series. If two mechanisms interact, peaks or troughs in the observed pattern may be the result of the interaction and not be caused by any of the two mechanisms.

### *Interpretations*

Our interpretation of the LL relations and the cycle patterns that we observe parallels the interpretation that there are external and internal forcing processes acting on different time scales (Fang et al., 2021). On the decadal, medium frequency scale, they conjecture that

variabilities are due to internal mechanisms in ocean system, whereas on the multidecadal, low frequency scale, they conjecture that variabilities are due to external forces.

The medium frequency components show the 20-year and 50-year cycles that may be internally driven and where the energy source for perturbations is baroclinic instability (Arzel et al., 2018), Arzel & Huck, 2020). However, Seip and Grøn (2019) found in a simulation study that when stochastic cycles in two adjacent ocean basins interact, they tend to show distinct cycle periods in both basins, but shift in time. Decadal cycle periods in the North Atlantic may also be related to local atmospheric processes that generate ocean circulation and changes in ocean heat transport (Hand et al., 2020). In addition to the cyclic patterns, there are LL relations between cyclic components in the AMOC, the AMO, and the NAO (Fang et al., 2021). There are different views on the direction of the LL relations, such as how they change and which frequencies the relations apply to. Fang et al. (2021) argued for the LL relation AMOC  $\rightarrow$  AMO (AMV) on a decadal time scale. Nigam et al. (2020) suggested the LL relation NAO  $\rightarrow$  AMO on decadal time scales. Seip and Wang (2022, Fig 7) found LL relations NAO  $\rightarrow$  AMO  $\rightarrow$  AMOC on decadal time scale, but not for high frequency, interannual time scales. However, low frequency oscillations, with periods longer than  $\approx 80$  years were not examined in any of the studies.

With the time span we are discussing ( $\approx 50$  years), low frequency components with multidecadal cycle periods are not possible to study numerically with sufficient confidence. Moore et al. (2022) demonstrated that there is a long-term trend,  $\approx 50$  years, in the heat flux for the Barents Sea Branch progressing from the Norwegian Sea through the Barents Sea towards the Novaya Zemlya. This heat flux may impact the low frequency component of the AMOC.

424 Mechanistic explanations are best formulated in modeling studies that are subsequently tested  
425 against observations and LL relations among paired variables.

426 In summary we find that until about 2000 the leading relation was from the UPP waters in the  
427 Barents Sea to the INT waters and the AMOC and AMO were both leading the UPP and the  
428 INT waters. However, the BIT and the BS-NE regions show contrasting patterns. Whereas in  
429 the BIT region, the AMOC was always leading, at the BS-NE region there was a cyclic LL  
430 pattern both for temperatures and salinities. Around the year 2000, persistent patterns ceased.  
431 An interpretation for the results for the  $\approx 30$  years period from 1971 to 2000 would be that  
432 both atmospheric variability and variabilities caused by AMOC and AMO influence the  
433 Barents Sea variabilities. It is reasonable that the atmospheric variabilities reflect variabilities  
434 in the AMOC and that the two forces act in some type of concert to make their imprint on  
435 Barents Sea variabilities. The changing LL patterns after 2000 may be the result of the  
436 increasing role for greenhouse gas concentrations in the atmosphere since about 1880, but  
437 Klavans et al. (2022) suggested that the dominating role start after 1950.

#### 438 5.4. Robustness

439 The AMOC can be measured and presented in several ways. For example, Wang et al. (2019)  
440 and the version by Caesar et al. (2021) generally fit peaks and troughs in the AMOC as  
441 measured at 26.5°N (2004 – 2016, but not in absolute values). We chose to use the AMOC  
442 (C ) series from Caesar et al. (2021) because the RAPID AMOC series from Moat et al.  
443 (2022) starts at 2004 and is, therefore, much shorter than our time period. Additionally, it is  
444 characteristic for the Atlantic Ocean south of 26°N. In Supplementary Material A, we  
445 calculate the LL relation between INT and AMOC based on an extension of AMOC (C) with  
446 the observed AMOC RAPID series from 2007, LL (INT, AMOC Ext.). The results from 2010  
447 to 2020 suggest that INT leads AMOC, that is opposite from the AMOC (C) results for the

last 10 years. However, the two series have opposite slopes after 2007. The LL(UPP, AMO) series and the LL(INT, AMOC(C)) series provide similar LL relations from 1971 to 2007, but ambiguous results after that time, supporting none of the AMOC versions, Figure 3 d and f.

The robustness of the LL relations can be evaluated by comparing LL relations between peaks and troughs in the paired time series. In Supplementary Material B we calculate the time series for INT and AMOC(C) with two LL methods, the HRLL method used here and the CCA method where one series (here the AMOC) is shifted relative to the other. First, we apply CCA to the time window 1971 -1998, where we find that INT persistently lags AMOC and we find that the regression coefficient,  $R$ , peaks at time steps - 4 and + 4, suggesting that there is no identifiable LL relation. However, visually inspecting the two time series, INT appears to lag AMOC with 2 to 3 years, consistent with the results from the HRLL method. Second, we apply CCA method to the whole series 1971-2021, the cross-correlation pattern is much less regular, suggesting that AMOC lags INT with more than 8 years. We conclude that the results with the HRLL method fit better to the visual LL patterns than the results from the CCA method.

An additional way to evaluate the robustness of the method is to apply the HRLL method to identical time series where one series is shifted backward in time ( $\delta$ ) units to mimic a causal relation between them. However, the parameter  $\delta$  should be less than  $\frac{1}{2}$  of the series cycle period to obtain a positive LL relation, Supplementary Material D.

There are four additional important caveats in the interpretation of the LL results. The time series we discuss are short ( $\approx 40$  years) and the LL relations between temperature variabilities among ocean basins may change on a interdecadal time scale (Seip et al., 2019). Therefore, our results may not apply to heat fluxes between the North Atlantic and the Barents Sea on multidecadal or centennial time scales. Second, we chose LOESS(0.3) smoothing to avoid

high frequency variability, but smoothing might distort the series. There appears to be variabilities in the series with long cycle periods, for example, 60 – 80 years for the AMOC (Arzel & Huck, 2020; Cheng et al., 2013), but those long periods may be due to other mechanisms than those responsible for decadal variability. Third, the deep water observations are down to 200 m ( $\approx 400$  m being close to bottom temperatures), but the relevant depths for the AMOC variability is down to 3500 m (Perez et al., 2015; Wang et al., 2019). However, the AMOC and the AMO covary ( $R \approx 0.5$ ) result in roughly the same LL relations. Furthermore, the exact pathways and properties of the deep waters entering the North Atlantic from the Nordic Seas/Barents Sea/Arctic are strongly influenced by the complex bottom topography, including ridges (Hand et al., 2020), and our results suggest that bottom topography, as well as the Coriolis force, may be candidates for explaining the difference between the BIT and the BS-NE regions. Lastly, we could have lengthened the period of nine time steps for calculating the moving LL window, but preferred the nine time intervals to be able to detect rapid changes in LL relations.

## 6. Conclusion

Applying the high-resolution method for identifying lead-lag relations between paired time series, we find that the upper ocean temperatures (0 – 30 m) in the Barents Sea from 1971 to 2018 were leading temperature changes in intermediate waters (100–200 m). We find that both the AMOC and the AMO were a leading variable to the temperature series in the Barents Sea at 100 to 200 m depth during the period 1971 to 2018 and at the Bear Island trough 400 - 420 m during the period 1980 to 2018. In contrast, the AMOC was both a leading and a lagging series to temperature and salinity in the BS-NE region. Our results support the view that, at least over the most recent 30 years from 1971 to 2000, it is the AMOC and the AMO that influence the Arctic waters, but there are important

1  
2  
3  
4  
5  
6  
7  
8  
9  
10  
11  
12  
13  
14  
15  
16  
17  
18  
19  
20  
21  
22  
23  
24  
25  
26  
27  
28  
29  
30  
31  
32  
33  
34  
35  
36  
37  
38  
39  
40  
41  
42  
43  
44  
45  
46  
47  
48  
49  
50  
51  
52  
53  
54  
55  
56  
57  
58  
59  
60

496 exceptions after the year 2000 for the AMO (Figure 3f) and for the AMOC in Northeast  
497 Barents Sea throughout the full period (Figure 4b). We suggest that different mechanisms on  
498 decadal and multidecadal time scales drive the interactions between the Barents Sea and the  
499 North Atlantic currents. On decadal time scales, 10– 30 years, internal mechanisms in the  
500 North Atlantic currents AMO and AMOC determine cycle periods and LL relations. On  
501 multidecadal time scale, external forces that affect the Barents Sea drive the interactions.

502

For Peer Review Only



## Figure legends

**Figure 1.** The Barents Sea observation regions (Skagseth et al. (2020). Region R4 is the Barents Sea Northeast (BS-NE) and R5 is the Bear Island trough (BIT). The color code to the right shows the amplitudes of 100–200 m temperature changes ( $^{\circ}\text{C d}^{-1}$ ) of the leading mode.

**Figure 2.** The Barents Sea temperature changes at depths 0–30 m (UPP) and 100–200 m (INT). a) The original time series from Skagseth et al. (2020) were normalized to unit standard deviation. The upper pair shows trends obtained by LOESS(0.8) smoothing the original series and shifted 3 units upward. The bottom pair shows the original series linearly detrended. LOESS smoothing is described in the text. b) Phase diagram for the two detrended time series in (a). UPP on x-axis, and INT on y-axis. c) Lower pair of time series in (a) LOESS(0.3) smoothed. The upper zigzag pattern shows cycle periods identified by the cumulative angle method applied to the two bottom series in Figure 2c (longest cycle is 14 years). In the method section, we discuss the cumulative angle method. d) Phase diagram of the time series in (c). Numbers are the last two digits in the year of observation. Closed curves correspond to the cycles in (c) and are color coded separately.

**Figure 3.** The Barents Sea temperature changes. a) Lead-lag relations between temperature variations in the upper ocean layer, UPP (0 - 30m) and the intermediate layer, INT (100 - 200 m). Results are based on linearly detrended data. In the legends, the numbers f, 2 are the LOESS smoothing parameters. b) Power spectral density for the series discussed in the text. c) Time series for the Barents Sea INT (100-200 m) and the AMOC. d) LL relations between the Barents Sea INT (100-200 m) and the AMOC, 1971- 2018,  $\theta(3)$  and LL(9). e) Time series for the Barents Sea UPP (0 - 30 m) and the AMO. f) LL relations between the Barents Sea UPP and the AMO, 1971- 2018,  $\theta(3)$  and LL(9).

**Figure 4.** Lead-lag (LL) relations between near-bottom temperature/salinity 1980-2018 at two locations in the Barents Sea and the AMOC. a) Time series for temperature and salinity at the Bear Island Trough, BIT, south of the Bear Island for the depth range 400 - 420 m and for the AMOC. b) LL relations for the two pairs of time series: Temperature vs. AMOC and salinity vs. AMOC. c) Time series for temperature and salinity at Barents Sea Northeast, BS-NE, for the depth range 300 -320 m and for the AMOC. d) LL relations for the two pairs of time series: Temperature vs. AMOC and salinity vs. AMOC.

*Acknowledgments.*

We would like to thank Øystein Skagseth and Ralf Hand for giving us advises on the study and for supplying data for the Barents Sea and the Labrador Sea, respectively.

*Data Availability Statement.*

All data and all calculations are available from the first author. Essential calculations and figures are made in a spreadsheet (Excel) and an example is shown in word format in Supplementary Material C. Some auxiliary calculations and the final figures are made in SigmaPlot. However, all calculations could be made in most computer packages.

**Author contributions:** KLS: Conceptualization; KLS, HW: Data curation; KLS, HW: Formal analysis; KLS, HW: Investigation; KLS: Methodology; KLS: Project administration; KLS: Resources; KLS: Software; KLS: Supervision; KLS, HW: Validation; KLS: Visualization; KLS: Roles/Writing - original draft; HW: Writing - review & editing.

**Conflict of interest.** None of the authors have any conflict of interest.

## REFERENCES

- Alexander, M. A., Blade, I., Newman, M., Lanzante, J. R., Lau, N. C., & Scott, J. D. (2002). The atmospheric bridge: The influence of ENSO teleconnections on air-sea interaction over the global oceans. *Journal of Climate*, 15(16), 2205-2231. [https://doi.org/Doi 10.1175/1520-0442\(2002\)015<2205:Tabtio>2.0.Co;2](https://doi.org/Doi 10.1175/1520-0442(2002)015<2205:Tabtio>2.0.Co;2)
- Arzel, O., & Huck, T. (2020). Contributions of Atmospheric Stochastic Forcing and Intrinsic Ocean Modes to North Atlantic Ocean Interdecadal Variability. *Journal of Climate*, 33(6), 2351-2370. <https://doi.org/10.1175/Jcli-D-19-0522.1>
- Arzel, O., Huck, T., & de Verdiere, A. C. (2018). The Internal Generation of the Atlantic Ocean Interdecadal Variability. *Journal of Climate*, 31(16), 6411-6432. <https://doi.org/10.1175/Jcli-D-17-0884.1>
- Asbjornsen, H., Arthun, M., Skagseth, O., & Eldevik, T. (2020). Mechanisms Underlying Recent Arctic Atlantification. *Geophysical Research Letters*, 47(15). <https://doi.org/ARTN e2020GL088036>
- 10.1029/2020GL088036
- Boers, N. (2021). Observation based early warning signals for a collapse of the Atlantic Meridional Overturning Circulation. *Nature Climate Change*, 11, 680-688.
- Caesar, L., McCarthy, G. D., Thornalley, D. J. R., Cahill, N., & Rahmstorf, S. (2021). *Current Atlantic Meridional Overturning Circulation weakest in last 1 millennium.*
- Caesar, L., McCarthy, G. D., Thornalley, D. J. R., Cahill, N., & Rahmstorf, S. (2021). Current Atlantic Meridional Overturning Circulation weakest in last millennium. *Nature Geoscience*, 14(3), 118-+. <https://doi.org/10.1038/s41561-021-00699-z>
- Caesar, L., Rahmstorf, S., Robinson, A., Feulner, G., & Saba, V. (2018). Observed fingerprints of weakening Atlantic Ocean overturning circulation. *Nature*, 556(191-196).
- Cheng, L. J., Zheng, F., & Zhu, J. (2015). Distinctive ocean interior changes during the recent warming slowdown. *Scientific Reports*, 5. <https://doi.org/ARTN 14346>
- 10.1038/srep14346
- Cheng, W., Chiang, J. C. H., & Zhang, D. X. (2013). Atlantic Meridional Overturning Circulation (AMOC) in CMIP5 Models: RCP and Historical Simulations. *Journal of Climate*, 26(18), 7187-7197. <https://doi.org/10.1175/Jcli-D-12-00496.1>
- Clement, A., Bellomo, K., Murphy, L. N., Cane, M. A., Mauritsen, T., Radel, G., & Stevens, B. (2015). The Atlantic Multidecadal Oscillation without a role for ocean circulation. *Science*, 350(6258), 320-+. <https://doi.org/10.1126/science.aab3980>
- Dickson, R. R., Osborn, T. J., Hurrell, J. W., Meincke, J., Blindheim, J., Adlandsvik, B., Vinje, T., Alekseev, G., & Maslowski, W. (2000). The Arctic Ocean response to the North Atlantic oscillation. *Journal of Climate*, 13(15), 2671-2696. [https://doi.org/Doi 10.1175/1520-0442\(2000\)013<2671:Taortt>2.0.Co;2](https://doi.org/Doi 10.1175/1520-0442(2000)013<2671:Taortt>2.0.Co;2)
- Drinkwater, K. F., Harada, N., Nishino, S., Chierici, M., Danielson, S. L., Ingvaldsen, R. B., Kristiansen, T., Hunt, G. L., Mueter, F., Stiansen, J. E., & Anderson, E. (2021). Possible future scenarios for two major Arctic Gateways connecting Subarctic and Arctic marine systems: I. Climate and physical-chemical oceanography. *Ices Journal of Marine Science*, 78(9), 3046-3065. <https://doi.org/10.1093/icesjms/fsab182>
- Enfield, D. B., Mestas-Nunez, A. M., & Trimble, P. J. (2001). The Atlantic multidecadal oscillation and its relation to rainfall and river flows in the continental US. *Geophysical Research Letters*, 28(10), 2077-2080. <https://doi.org/Doi 10.1029/2000gl012745>
- Fang, S.-W., Khodri, M., Timmreck, C., Davide, Z., & Jungclaus, J. (2021). Disentangling Internal and External Contributions to Atlantic Multidecadal Variability Over the Past Millennium. *Geophysical Research Letters*, 48(e2021GL095990.). <https://doi.org/https://doi.org/10.1029/2021GL095990>

- 598 Fang, S. W., Khodri, M., Timmreck, C., Zanchettin, D., & Jungclaus, J. (2021). Disentangling Internal  
599 and External Contributions to Atlantic Multidecadal Variability Over the Past Millennium.  
600 *Geophysical Research Letters*, 48(23). <https://doi.org/ARTN e2021GL095990>  
601 10.1029/2021GL095990
- 602 Frajka-Williams, E., Ansorge, I. J., Baehr, J., Bryden, H. L., Chidichimo, M. P., Cunningham, S. A.,  
603 Danabasoglu, G., Dong, S. F., Donohue, K. A., Elipot, S., Heimbach, P., Holliday, N. P.,  
604 Hummels, R., Jackson, L. C., Karstensen, J., Lankhorst, M., Le Bras, I. A., Lozier, M. S.,  
605 McDonagh, E. L., . . . Wilson, C. (2019). Atlantic Meridional Overturning Circulation:  
606 Observed Transport and Variability. *Frontiers in Marine Science*, 6. <https://doi.org/UNSP 260>  
607 10.3389/fmars.2019.00260
- 608 Hand, R., Bader, J., Matei, D., Ghosh, R., & Jungclaus, J. H. (2020). Changes of Decadal SST Variations  
609 in the Subpolar North Atlantic under Strong CO<sub>2</sub> Forcing as an Indicator for the Ocean  
610 Circulation's Contribution to Atlantic Multidecadal Variability. *Journal of Climate*, 33(8),  
611 3213-3228. <https://doi.org/10.1175/Jcli-D-18-0739.1>
- 612 Kalnay, E., Kanamitsu, M., Kistler, R., Collins, W., & Deaven, D. (1996). The NCEP/NCAR 40-Year  
613 Reanalysis Project. *Bull. Amer. Meteor. Soc.*, 77, 437-472.
- 614 Klavans, J. M., Clement, A. C., Cane, M. A., & Murphy, L. N. (2022). The Evolving Role of External  
615 Forcing in North Atlantic SST Variability over the Last Millennium.
- 616 Krüeger, J. J. (2021). A Wavelet Evaluation of Some Leading Business Cycle Indicators for the German  
617 Economy. *Journal of Business Cycle Research*.  
618 <https://doi.org/https://doi.org/10.1007/s41549-021-00060-8>
- 619 Krüger, J. (2021). A Wavelet Evaluation of Some Leading Business Cycle Indicators for the German  
620 Economy. *Journal of Business Cycle Research* 17, 293-319.
- 621 Le Bras, I. A. A., Willis, J., & Fenty, I. (2023). The Atlantic Meridional Overturning Circulation at 35  
622 degrees N From Deep Moorings, Floats, and Satellite Altimeter. *Geophysical Research*  
623 *Letters*, 50(10). <https://doi.org/ARTN e2022GL101931>  
624 10.1029/2022GL101931
- 625 Li, F., Lozier, M. S., Bacon, S., Bower, A. S., Cunningham, S. A., de Jong, M. F., DeYoung, B., Fraser, N.,  
626 Fried, N., Han, G., Holliday, N. P., Holte, J., Houpert, L., Inall, M. E., Johns, W. E., Jones, S.,  
627 Johnson, C., Karstensen, J., Le Bras, I. A., . . . Zhou, C. (2021). Subpolar North Atlantic western  
628 boundary density anomalies and the Meridional Overturning Circulation. *Nature*  
629 *communications*, 12(1). <https://doi.org/ARTN 3002>  
630 10.1038/s41467-021-23350-2
- 631 Li, F., Lozier, M. S., Bacon, S., Bower, A. S., Cunningham, S. A., de Jong, M. F., deYoung, B., Fraser, N.,  
632 Fried, N., Han, G., Holliday, N. P., Holte, J., Houpert, L., Inall, M. E., Johns, W. E., Jones, S.,  
633 Johnson, C., Karstensen, J., Le Bras, I. A., . . . Zhou, C. (2022). Subpolar North Atlantic western  
634 boundary density anomalies and the Meridional Overturning Circulation (vol 12, 3002 ,  
635 2021). *Nature communications*, 13(1). <https://doi.org/ARTN 739>  
636 10.1038/s41467-022-28397-3
- 637 Li, S. J., Wu, L. X., Yang, Y., Geng, T., Cai, W. J., Gan, B. L., Chen, Z. H., Jing, Z., Wang, G. J., & Ma, X. H.  
638 (2020). The Pacific Decadal Oscillation less predictable under greenhouse warming. *Nature*  
639 *Climate Change*, 10(1), 30-+. <https://doi.org/10.1038/s41558-019-0663-x>
- 640 Mann, M. E., Steinman, B. A., & Miller, S. K. (2020). Absence of internal multidecadal and  
641 interdecadal oscillations in climate model simulations. *Nature communications*, 11(49).  
642 <https://doi.org/https://doi.org/10.1038/s41467-019-13823-w> |  
643 [www.nature.com/naturecommunications](http://www.nature.com/naturecommunications)
- 644 Moat, B. I., Frajka-Williams, E., Smeed, D. A., Rayner, D., Johns, W. E., Baringer, M. O., Volkov, D., &  
645 Collins, J. M. (2022). Atlantic meridional overturning circulation observed by the RAPID-

- URL: <http://mc.manuscriptcentral.com/a-o>



- Seip, K. L., & Reynolds, C. S. (1995). Phytoplankton Functional Attributes Along Trophic Gradient and Season. *Limnology and Oceanography*, 40(3), 589-597. <https://doi.org/DOI10.4319/lo.1995.40.3.0589>
- Seip, K. L., & Wang, H. (2022). The North Atlantic Oscillations: Lead–Lag Relations for the NAO, the AMO, and the AMOC - A High-Resolution Lead–Lag Analysis. *Climate*, 10(5). <https://doi.org/https://doi.org/10.3390/cli10050063>
- Seip, K. L., & Wang, H. (2022). The North Atlantic Oscillations: Lead–Lag Relations for the NAO, the AMO, and the AMOC. A High-Resolution Lead–Lag Analysis. *Climate*, 10, 19, Article 63. <https://doi.org/https://doi.org/10.3390/cli10050063>
- Skagseth, O., Eldevik, T., Arthun, M., Asbjornsen, H., Lien, V. D. S., & Smedsrud, L. H. (2020). Reduced efficiency of the Barents Sea cooling machine. *Nature Climate Change*, 10(7), 661-+. <https://doi.org/10.1038/s41558-020-0772-6>
- Sugihara, G., May, R., Ye, H., Hsieh, C. H., Deyle, E., Fogarty, M., & Munch, S. (2012). Detecting Causality in Complex Ecosystems. *Science*, 338(6106), 496-500. <https://doi.org/10.1126/science.1227079>
- Sugihara, G., & May, R. M. (1990). Nonlinear forecasting as a way of distinguishing chaos from measurement errors in time series. *Nature*, 344, 731-741.
- Tomte, O. T., Seip, K. L., & Christophersen, N. (1998). Evidence that loss in predictability increases with weakening of (metabolic) links to physical forcing functions in aquatic ecosystems. *Oikos*, 82(2), 325-332. <Go to ISI>://000074878700014
- Trenberth, K. E. (2020). Understanding climate change through Earth's energy flows. *Journal of the Royal Society of New Zealand*, 50(2), 331-347. <https://doi.org/10.1080/03036758.2020.1741404>
- Tsonis, A. A., Deyle, E. R., May, R. M., Sugihara, G., Swanson, K., Verbeten, J. D., & Wang, G. L. (2015). Dynamical evidence for causality between galactic cosmic rays and interannual variation in global temperature. *Proceedings of the National Academy of Sciences of the United States of America*, 112(11), 3253-3256. <https://doi.org/DOI10.1073/pnas.1420291112>
- Wang, Z. L., Brickman, D., & Greenan, B. J. W. (2019). Characteristic evolution of the Atlantic Meridional Overturning Circulation from 1990 to 2015: An eddy-resolving ocean model study. *Deep-Sea Research Part I-Oceanographic Research Papers*, 149. <https://doi.org/ARTN10305610.1016/j.dsr.2019.06.002>
- Wu, T. W., Hu, A. X., Gao, F., Zhang, J., & Meehl, G. A. (2019). New insights into natural variability and anthropogenic forcing of global/regional climate evolution. *Npj Climate and Atmospheric Science*, 2. <https://doi.org/UNSP1810.1038/s41612-019-0075-7>
- Zhang, R. (2010). Latitudinal dependence of Atlantic meridional overturning circulation (AMOC) variations. *Geophysical Research Letters*, 37. <https://doi.org/ArtnL1670310.1029/2010gl044474>
- Zhang, R., Sutton, R., Danabasoglu, G., Kwon, Y. O., Marsh, R., Yeager, S. G., Amrhein, D. E., & Little, C. M. (2019). A Review of the Role of the Atlantic Meridional Overturning Circulation in Atlantic Multidecadal Variability and Associated Climate Impacts. *Reviews of Geophysics*, 57(2), 316-375. <https://doi.org/10.1029/2019rg000644>
- Supplementary Materials

# Supplementary Material A. AMOC and NAO Series

We have two time series for the AMOC over the period from 2004 to 2019. One series is from Caesar, McCarthy [6] and personal communication. The other is from the website <http://www.acsis.ac.uk/climate-indicators/atlantic-meridional-overturning-circulation> (accessed on 15 March 2022) and <https://rapid.ac.uk/>, but reprocessed by Michael N. Evans [mnevans@umd.edu](mailto:mnevans@umd.edu). The AMOC 41 series 2002 to 2012 are from Wang et al. (2019). The series are centered and normalized to unit standard deviation in Figure A a.

# Supplementary Material B. Lead-lag methods

## *Comparing the high-resolution LL method (HRLl) with cross-correlation analysis (CCA).*

Figure B demonstrates that the paired time series and the LL relations between the series (for example with respect to the peaks) can be compared visually to the calculated LL relations in Figure B c. The cycle periods (distance between peaks) are approximately 8 years and AMOC leads INT with approximately two years. Figure B b demonstrates the regression coefficient,  $R$ , as a function of shifts between the two series. The blue line shows CCA between the two time series limited to the period 1971 – 1998 where AMOC leads INT. The red lines show CCA for the whole series. It is more “untidy” than the blue line because the series becomes less stationary when the period from 1998 to 2021 is added. Figure B d shows a phase plot of the series in (a). Trajectory colors represent sections of the time series.

*Differences between the HRLl method and the CCA method.* The HRLl method calculates LL relations for pairs of three consecutive observations, whereas the CCA method requires stationary series. The two peaks connected by red and black horizontal bars in Figure B a should preferably be of equal height and overlap when one series is shifted relative to the other using the CCA method. With the HRLl method, the rotation of the trajectories corresponds well with the visually observed LL relations in the time series plot.

### 764 Supplementary Material C. Detrending and Filtering

765 Only a few of the blue bars in panel b) are exceeding the 95% confidence level, whereas the  
766 pink and the cyan bars show almost the same temporal patterns, and most bars are significant.

### 767 Supplementary Material D. Time series shifted relative to itself

768 This example is from Seip and Wang (2022).

## 769 Supplementary Material Figures

770 **Figure SA.** Comparing three different AMOC series. a) The AMOC from Caesar et al. (2021)  
771 (blue line). The data are cross-year average values from April one year to March next year, and  
772 with the Ekman (wind-driven) component removed. The black line shows the AMOC from  
773 Caesar truncated at 2007 and extended with the AMOC at 26°N, AMOC Ext. The data are from  
774 <https://rapid.ac.uk> for 2007 to 2020. The regression lines (straight lines) show regressions from  
775 2009 to 2019, that is, the last decade. b) LL(INT, AMOC Ext) relations. Blue bars show  
776 LL(INT, AMOC Ext) and grey bars show Ang (INT, AMOC Ext). LL and Ang - values are  
777 calculated over 9 and 3 synoptic and consecutive observations respectively. c) Comparing  
778 NAO and North Atlantic Temperature for the years 1971 to 2019. Temperature is taken from  
779 Kalnay et al. (1996). d) Map showing the area used to calculate temperatures, Source Kalnay  
780 et al. (1996).

782 **Figure SB.** AMOC and INT time series. a) The time series AMOC (Caesar) and INT. The  
783 drop lines show the period 1998 – 2004 where INT leads AMOC. The horizontal lines show  
784 distance between peaks. b) Cross-correlation analysis (CCA) for INT and AMOC. The blue  
785 line shows CCA only for the period 1971 to 1998 where INT persistently lags AMOC. The  
786 red line shows CCA for the whole period 1971 to 2020. c) LL relations for the time series in  
787 (a). d) Phase plot for INT and AMOC. The thin black line shows the phase plot for the whole



series. The red line shows the period 1998 to 2004 and the blue line shows the period 2004 to 2021.

**Figure SC.** Barents Sea temperatures at 0-30 m and 100-200 m depth. a) Temperatures in raw and LOESS(0.3) smoothed format. Drop lines designate peaks in the smoothed versions of the curves. b) Blue bars show lead-lag (LL) relations between temperatures UPP and INT not detrended and unsmoothed. c) Pink bars show the LL relations between temperatures UPP and INT not detrended, but LOESS(0.3) smoothed. d) Cyan bars show the LL relations between temperatures UPP and INT detrended and LOESS(0.3) smoothed. Dashed lines in (b) – (d) show the 95 % confidence interval.

**Figure SD.** Example: AMOC LOESS(0.3)-smoothed (x) and shifted forward six years (y). a) AMOC time series, original (blue) and shifted 6 years forward. The zigzag curve indicates the length of years found by the cumulative angle method. b) LL relations between AMOC original and AMOC shifted 6 years forward, LL(AMOC, AMOC+6). The black bars show  $\theta(3)$ ; that is, LL relation over three consecutive observations in the paired time series. The grey bars show LL(9); that is, the relation between positive and negative angles over 9 consecutive observations. (c) Phase plot for the pairs AMOC and AMOC+6. Note that most rotations are counterclockwise (positive, +) showing that AMOC leads AMOC +6. d) Phase shifts calculated relative to moving cycle period and with average cycle period. The phase shift corresponds to the six years of a phase shift. Lowe curve shows moving  $\beta$ -coefficient.
