# Supplementary material
Source: publisher figshare collection journal article supplement (https://tandf.figshare.com/articles/dataset/_/24117920)

**Figure 4**

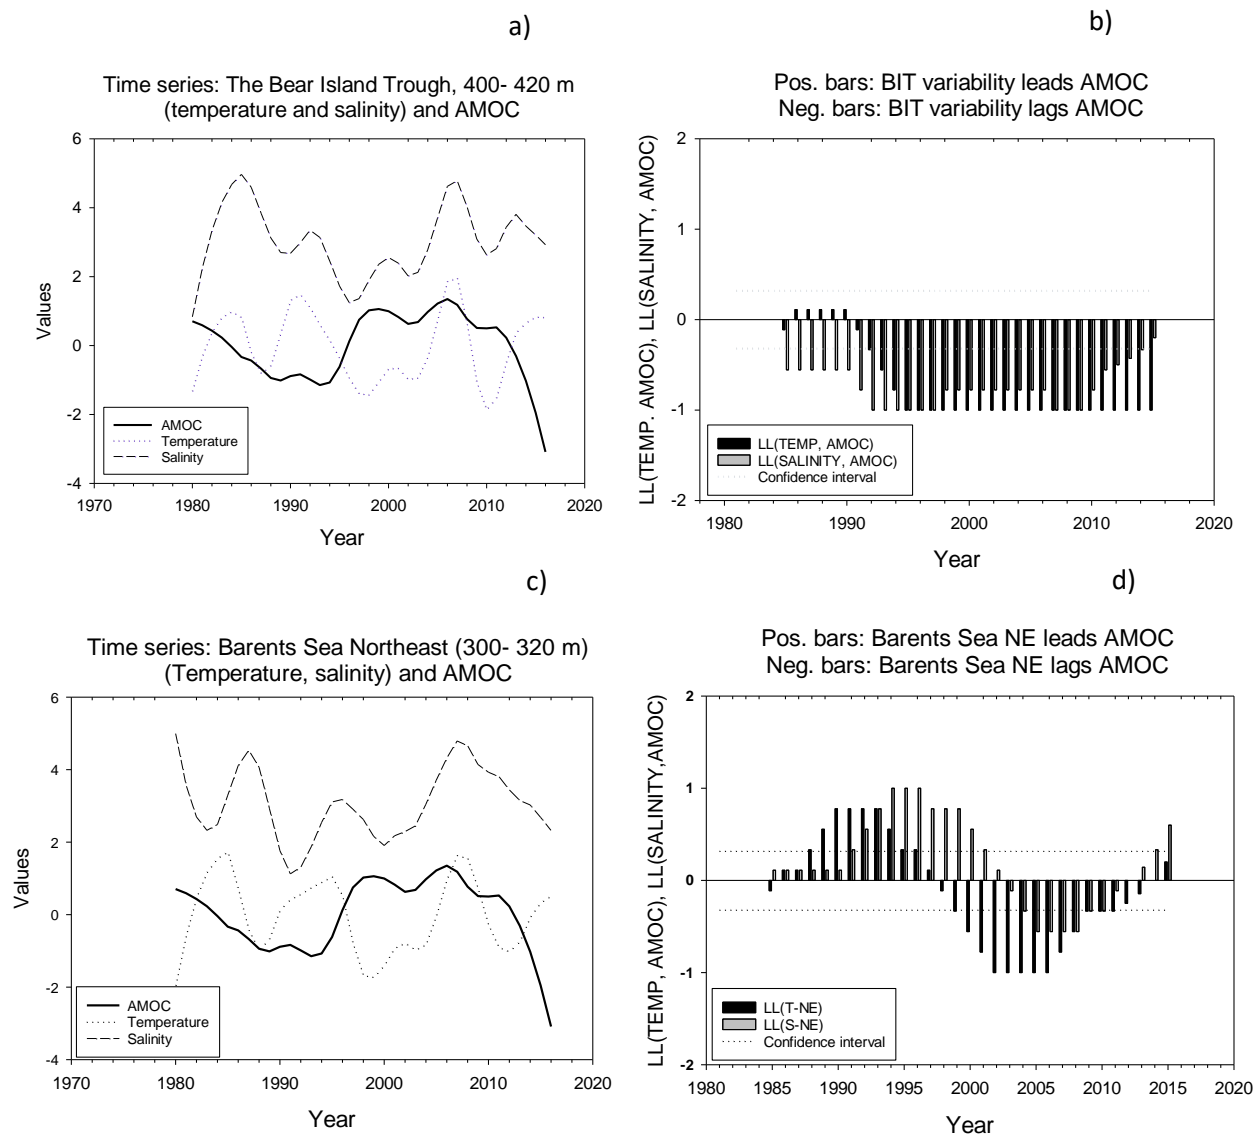

Supplement: Supplementary file 1 [file 1]

**Figure 3 Results 1**

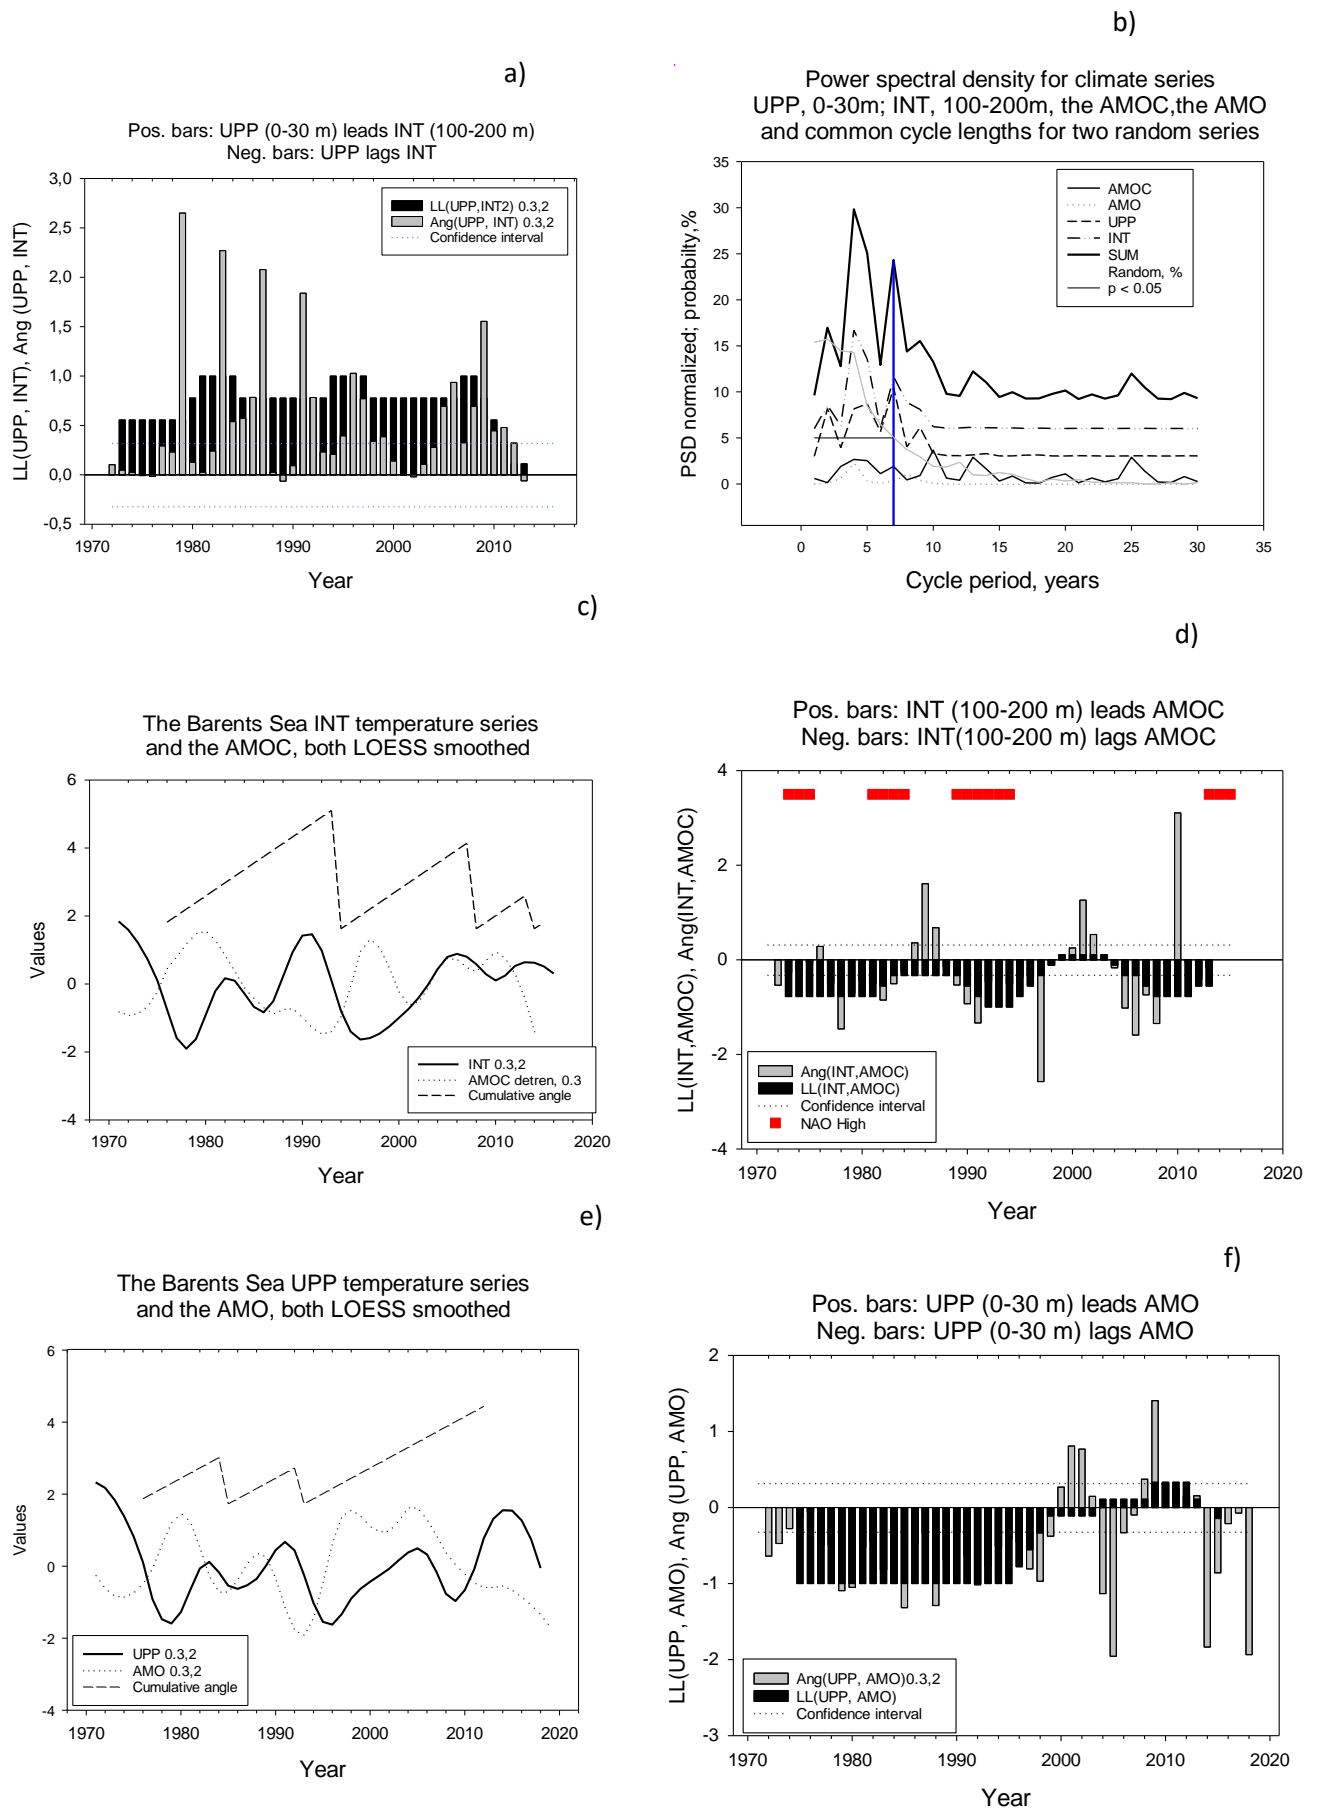

Supplement: Supplementary file 2 [file 1]

## Supplementary material A

Figure SA

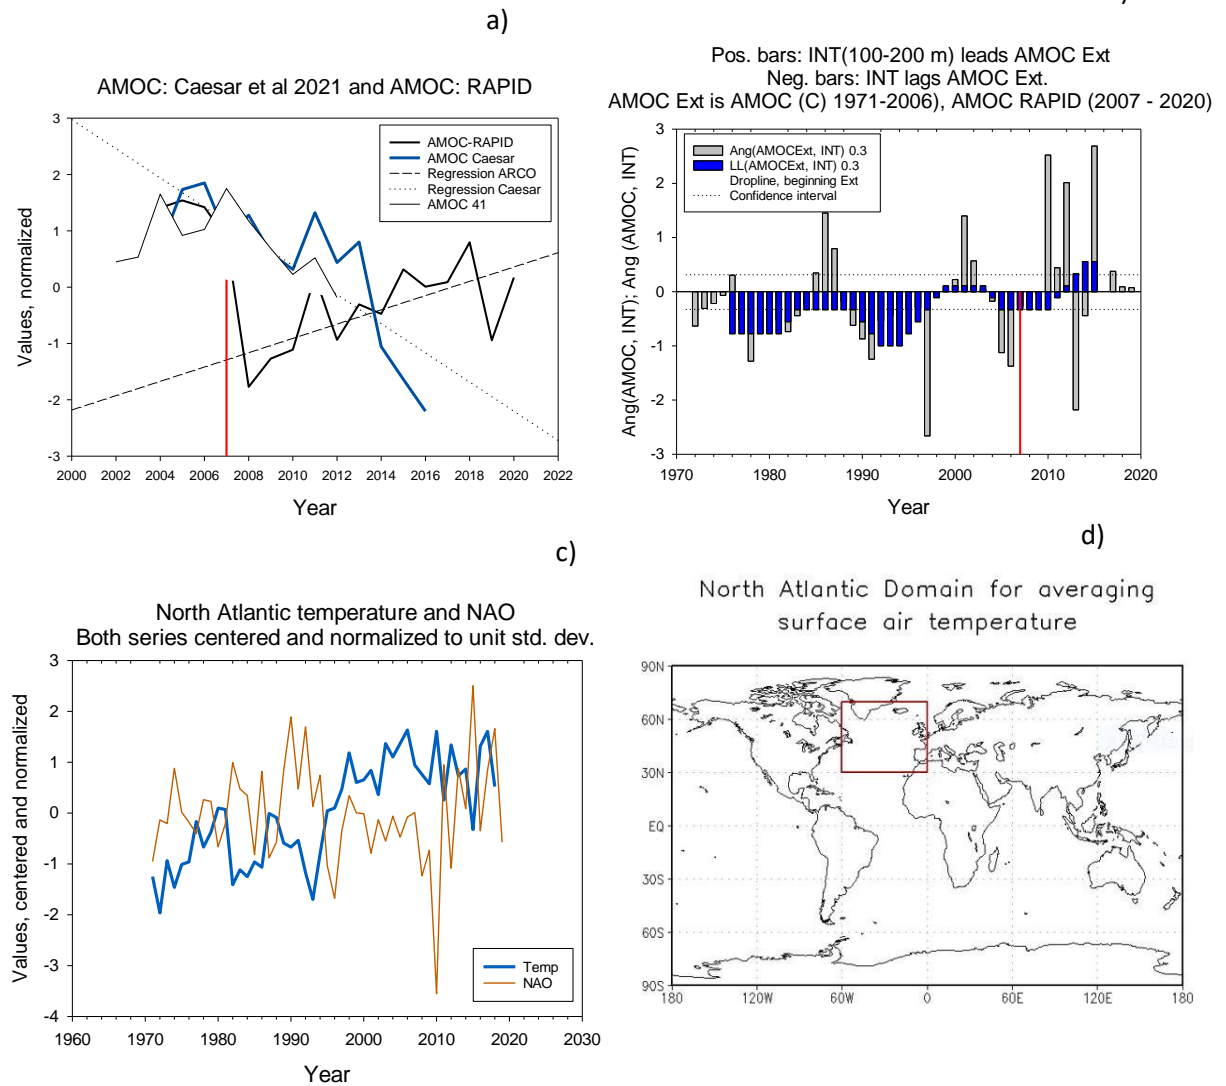

Supplement: Supplementary file 3 [file 1]

# Supplementary material Figure SB

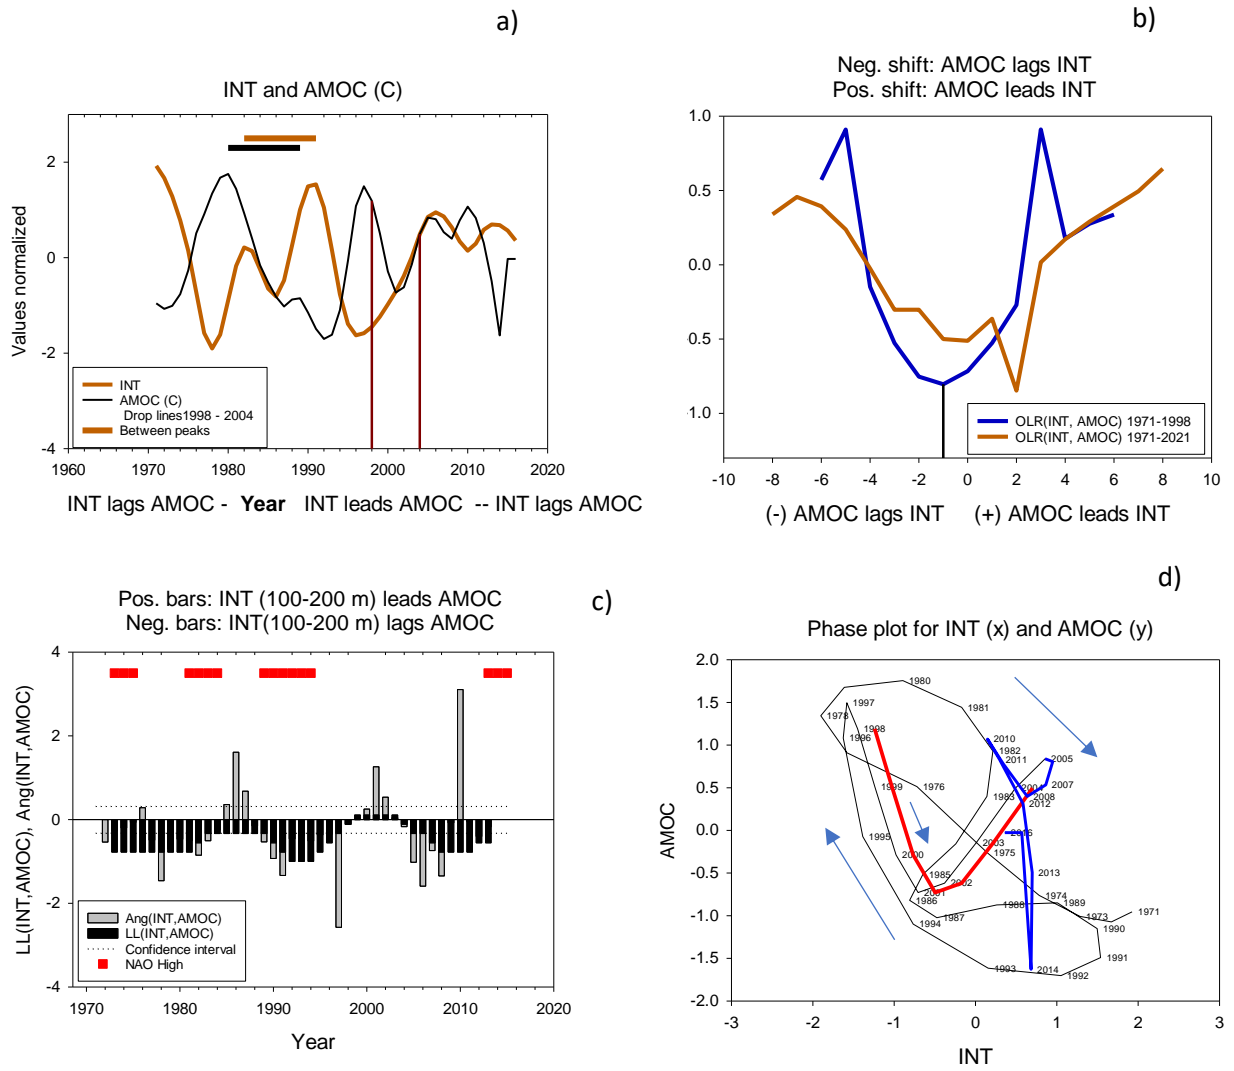

Supplement: Supplementary file 4 [file 1]

# Supplementary Material Figure C

a)

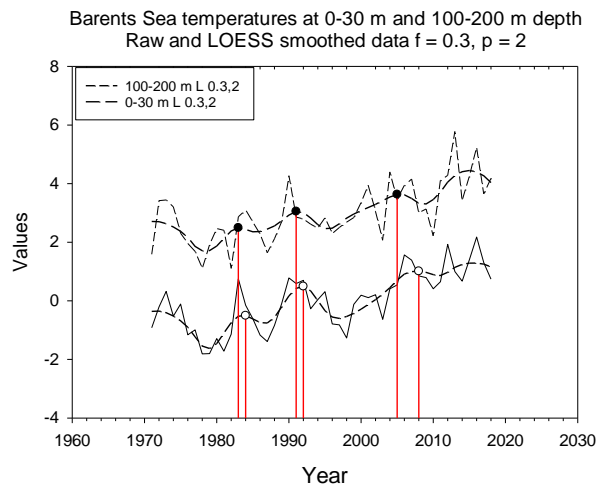

b)

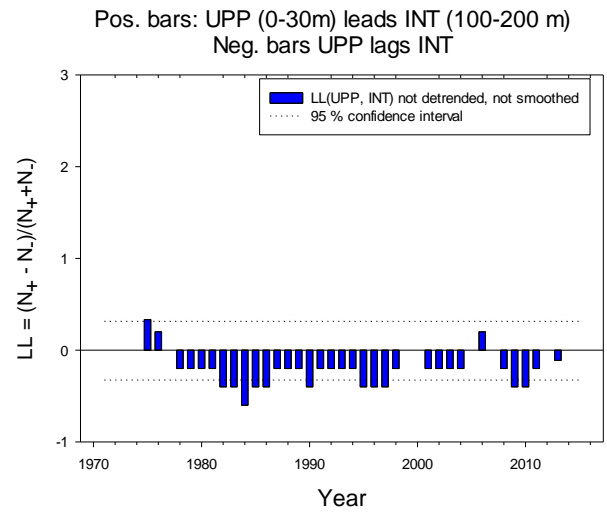

c)

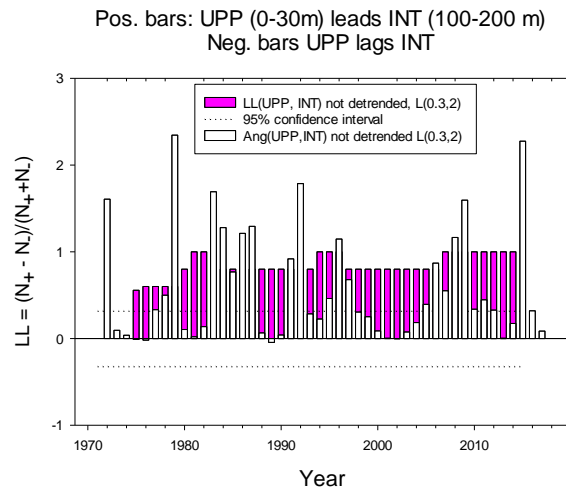

d)

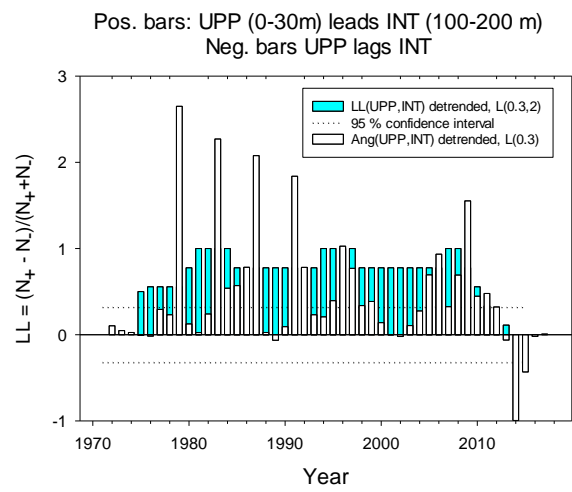

Supplement: Supplementary file 5 [file 1]

Figure 2

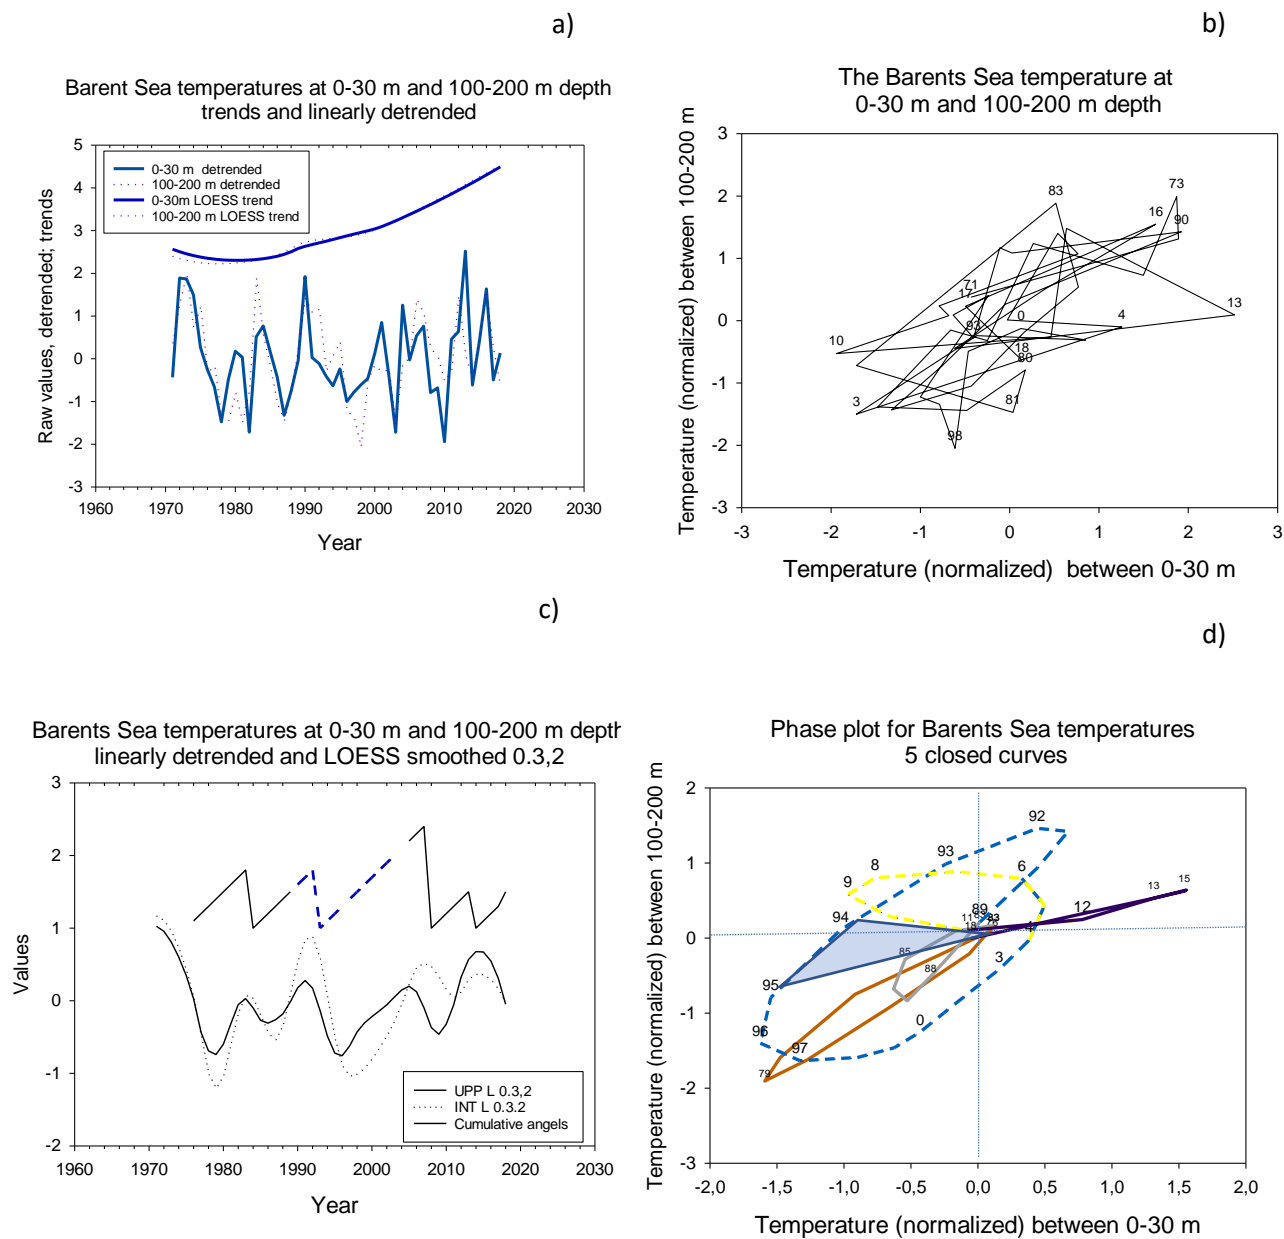

Supplement: Supplementary file 6 [file 1]

**Figure 1**

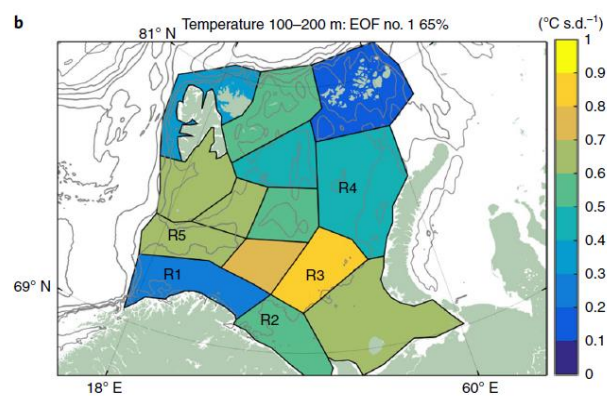

Supplement: Supplementary file 7 [file 1]

Figure SD, Supplementary material D

a)

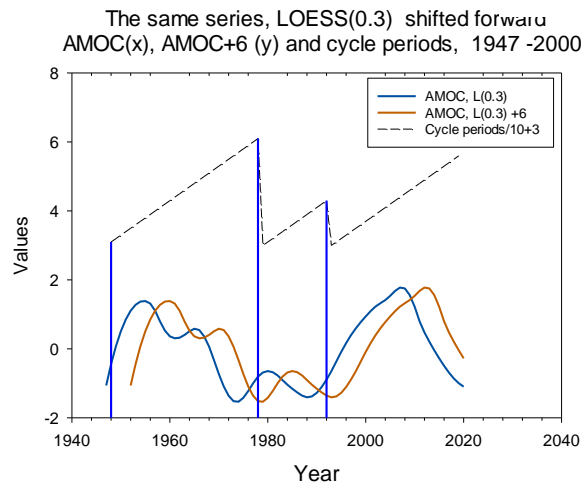

b)

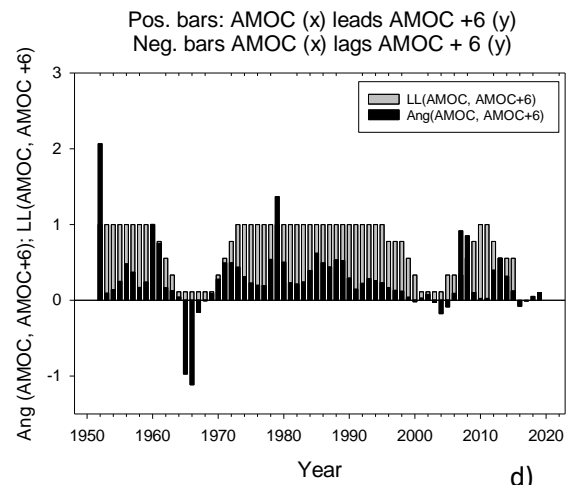

c)

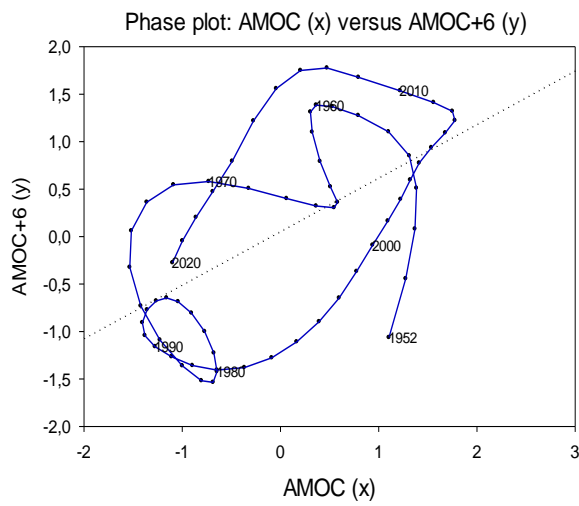

d)

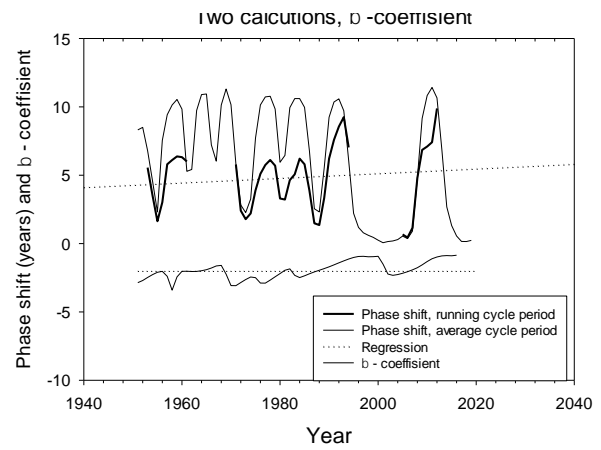

Supplement: Supplementary file 9 [file 1]
